# Supplementary material for: Association between subjective well-being and the risk of cardiovascular diseases among older adults: evidence from the Chinese Longitudinal Healthy Longevity Survey
Source: Research Square preprint supplement (doi:10.21203/rs.3.rs-6821093/v1), 2025-06-17
Supplement: Supplementary file 1 [file 802a05a727c5460e655bafd4.docx]

**Supplementary Material**

**Supplementary Table 1** Multiple scales, their answers and score assignment rule used in this study

**Supplementary Table 2** The variable with missing value and the percentage of missing value

**Supplementary Table 3** The association between SWB and the risk of CVD among Chinese older adults suggested by hierarchical regression based on modified Poisson regressions

**Supplementary Table 4** The association between SWB and the risk of CVD among Chinese older adults with healthy BMI suggested by multivariable modified Poisson regressions

**Supplementary Table 5** The association between SWB and the risk of CVD among Chinese older adults with unhealthy BMI suggested by multivariable modified Poisson regressions

**Supplementary Table 6** The association between SWB and the risk of CVD among Chinese older adults never smoking suggested by multivariable modified Poisson regressions

**Supplementary Table 7** The association between SWB and the risk of CVD among Chinese older adults ever or currently smoking suggested by multivariable modified Poisson regressions

**Supplementary Table 8** The association between SWB and the risk of CVD among Chinese older adults never drinking suggested by multivariable modified Poisson regressions

**Supplementary Table 9** The association between SWB and the risk of CVD among Chinese older adults ever or currently drinking suggested by multivariable modified Poisson regressions

**Supplementary Table 10** The association between SWB and the risk of CVD among Chinese older adults never or ever do physical exercise suggested by multivariable modified Poisson regressions

**Supplementary Table 11** The association between SWB and the risk of CVD among Chinese older adults currently do physical exercise suggested by multivariable modified Poisson regressions

**Supplementary Table 12** The association between SWB and the risk of CVD among Chinese older adults with healthy sleep suggested by multivariable modified Poisson regressions

**Supplementary Table 13** The association between SWB and the risk of CVD among Chinese older adults with unhealthy sleep suggested by multivariable modified Poisson regressions

**Supplementary Table 14** The association between SWB and the risk of CVD among Chinese older adults with healthy diet suggested by multivariable modified Poisson regressions

**Supplementary Table 15** The association between SWB and the risk of CVD among Chinese older adults with unhealthy diet suggested by multivariable modified Poisson regressions

**Supplementary Table 16** The association between SWB and the risk of CVD among Chinese older adults with 0-2 healthy lifestyles suggested by multivariable modified Poisson regressions

**Supplementary Table 17** The association between SWB and the risk of CVD among Chinese older adults with 1-3 healthy lifestyles suggested by multivariable modified Poisson regressions

**Supplementary Table 18** The association between SWB and the risk of CVD among Chinese older adults with 2-4 healthy lifestyles suggested by multivariable modified Poisson regressions

**Supplementary Table 19** The association between SWB and the risk of CVD among Chinese older adults with 3-5 healthy lifestyles suggested by multivariable modified Poisson regressions

**Supplementary Table 20** The association between SWB and the risk of CVD among Chinese older adults with 4-6 healthy lifestyles suggested by multivariable modified Poisson regressions

**Supplementary Table 21** The association between SWB and the risk of CVD among Chinese older adults suggested by multivariable log-binomial regressions (Model S1)

**Supplementary Table 22** The association between SWB and the risk of CVD among Chinese older adults suggested by multivariable modified Poisson regressions based on complete-case method (Model S2)

**Supplementary Table 23** The association between SWB and the risk of CVD among Chinese older adults suggested by multivariable modified Poisson regressions with MCCs was replaced by chronic conditions considered as risk factors of CVD (Model S3)

**Supplementary Table 24** The association between SWB and the risk of CVD among Chinese older adults suggested by multivariable modified Poisson regressions with SWB score was transformed to categorical variable (Model S4)

**Supplementary Table 25** The association between SWB and the risk of CVD among Chinese older adults suggested by multivariable modified Poisson regressions adjusting for covariates with P < 0.10 in differential comparison (Model S5)

**Supplementary Figure 1** The linear relationship between SWB score and the risk of CVD showed by restrict cubic spline on the basis of binary logistic regressions. A: univariable binary logistic regressions, B: multivariable binary logistic regressions

**Supplementary Table 1** Multiple scales, their answers and score assignment rule used in this study

| **Scale/item** | **Answers/labels** | **Score** |
| --- | --- | --- |
| **Subjective well-being scale** |  | Range: from 15 to 40 |
| How do you rate your life at present | 1=Very good, 2=good, 3=so so, 4=bad, 5=very bad | From 5 to 1 |
| Do you always look on the bright side of things | 1=always, 2=often,3=sometimes, 4=seldom, 5=never | From 1 to 5 |
| Do you like to keep your belongings neat and clean |
| Can you make your own decisions |
| Are you happy as younger |
| Do you often feel fearful or anxious | From 5 to 1 |
| Do you feel lonely and isolated |
| Do you feel useless with age |
| **The dietary diversity scale** |  | Range: from 0 to 9 |
| How often eat fresh fruit | 1=almost everyday, 2=quite often, 3=occasionally, 4=rarely or never | If the answer is “almost everyday” “quite often” or “not everyday, but at least once per week”, the score is 1; otherwise, the score is 0. |
| How often eat vegetables |
| How often eat meat at present | 1=almost everyday, 2=not everyday, but at least once per week; 3=not every week, but at least once per month; 4=not every month, but occasionally; 5=rarely or never |
| How often eat fish at present |
| How often eat eggs at present |
| How often eat food made from beans at present |
| How often drink tea at present |
| How often eat milk products at present |
| How often eat nut products at present |
| **Activities score** |  | Range: from 0 to 32 |
| Do you do house work at present | 1=almost everyday; 2=not daily, but once for a week; 3=not weekly, but at least once for a month; 4=not monthly, but sometimes; 5=never | From 4 to 0 |
| Do you grow vegetables & do other field work at present |
| Do you do garden work |
| Do you read newspapers/books at present |
| Do you raise domestic animals/pets at present |
| Do you play cards/mah-jongg at present |
| Do you watch TV or listen to radio at present |
| Do you take part in some social activities at present |
| **The mini-mental state examination** |  | Range: from 0 to 30 |
| General competence |  |  |
| What time of day is it right now | 0=wrong, 1=correct, 8=unable to answer | If the answer is “wrong” or “unable to answer”, the score is 0; if the answer is “correct”, the score is 1 |
| What is the animal year of this year |
| What is the date of the mid-autumn festival |
| What is the season right now |
| What is the name of this county or district |
| Name the things that can be eaten | Score 1 for 1 correct answer, score 7 for 7 or more answers | |
| Recall |  |  |
| Name the “table” correctly | 0=wrong, 1=correct, 8=unable to answer | If the answer is “wrong” or “unable to answer”, the score is 0; if the answer is “correct”, the score is 1 |
| Name the “apple” correctly |
| Name the “clothes” correctly |
| Attention and calculation |  |  |
| 20–3 =? | 0=wrong, 1=correct, 8=unable to answer | If the answer is “wrong” or “unable to answer”, the score is 0; if the answer is “correct”, the score is 1 |
| 20–3-3 =? |
| 20–3-3-3 =? |
| 20–3–3-3-3-3 =? |
| 20–3–3-3-3-3-3 =? |
| Copy the figure on the card |
| Delayed recall |  |  |
| Repeat “table, apple, clothes” as remembered in the “responsiveness section” | 0=wrong, 1=correct, 8=unable to answer | If the answer is “wrong” or “unable to answer”, the score is 0; if the answer is “correct”, the score is 1 |
| Language |  |  |
| Name the object the investigator is pointing to as “pen” | 0=wrong, 1=correct, 8=unable to answer | If the answer is “wrong” or “unable to answer”, the score is 0; if the answer is “correct”, the score is 1 |
| Name the “watch” to which the investigator is referring |
| Repeat the assigned sentence from the investigator |
| Ask the respondent to hold the paper in their right hand |
| Ask the respondent to fold the paper in half |
| Ask the respondent to place the paper on the floor |
| **Basic activities of daily living** |  | Range: from 6 to 18 |
| Do you need help bathing | 1=without assistance, 2=one part assistance, 3=more than one part assistance | From 3 to 1 |
| Do you need help getting dressing | 1=without assistance, 2=need assistance for trying shoes, 3=assistance in getting clothes and getting dressed |
| Do you need help toileting | 1=without assistance, 2=assistance in cleaning or arranging clothes, 3=don't use toilet |
| Do you need help with indoor transferring | 1=without assistance, 2=with assistance, 3=bedridden |
| Can you can control your bowel and urine (continence) | 1=without assistance, 2=occasional accidents, 3=incontinent |
| Do you need help feeding | 1=without assistance, 2=with some help, 3=need feeding |

**Supplementary Table 2** The variable with missing value and the percentage of missing value

| Variable/question/item/scale | Frequency (n) | Percentage (%) |
| --- | --- | --- |
| Demographic characteristics |  |  |
| Sex | 466 | 9.1 |
| Current marital status (marital status) | 16 | 0.31 |
| Years of schooling (education) | 17 | 0.33 |
| Main occupation before age 60 (occupation) | 489 | 9.55 |
| Do you have retirement pension at present (pension) | 108 | 2.11 |
| Home environment and lifestyles |  |  |
| Which fuels are normally used for cooking in your home (cooking fuels) | 95 | 1.86 |
| Does your home frequently have a mildew odor or musty smell (mildew odor at home) | 86 | 1.68 |
| Smoke or not at present (smoke status) | 21 | 0.41 |
| Smoked or not in the past (smoke status) | 12 | 0.23 |
| Drink or not at present (drinking status) | 45 | 0.88 |
| Drank or not in the past (drinking status) | 14 | 0.27 |
| How long do you sleep normally (duration of sleep) | 22 | 0.43 |
| Exercise or not at present (regular exercise) | 50 | 0.98 |
| Exercised or not in the past (regular exercise) | 47 | 0.92 |
| Activities score |  |  |
| Do you do house work at present | 2 | 0.04 |
| Do you grow vegetables or other field work at present | 1 | 0.02 |
| Do you do garden work at present | 4 | 0.08 |
| Do you read newspapers/books at present | 5 | 0.10 |
| Do you raise domestic animals/pets at present | 5 | 0.1 |
| Do you play cards/mah-jongg at present | 7 | 0.14 |
| Do you watch tv or listen to radio at present | 3 | 0.06 |
| Do you take part in some social activities at present | 13 | 0.25 |
| Dietary diversity score |  |  |
| How often eat fresh fruit at present | 4 | 0.08 |
| How often eat vegetables at present | 12 | 0.23 |
| How often eat meat at present | 9 | 0.18 |
| How often eat fish at present | 8 | 0.16 |
| How often eat eggs at present | 7 | 0.14 |
| How often eat food made from beans at present | 10 | 0.2 |
| How often drink tea at present | 14 | 0.27 |
| How often eat milk products at present | 10 | 0.2 |
| How often eat nut products at present | 11 | 0.21 |
| Healthcare-related information |  |  |
| Get adequate medical service at present (adequate medical service) | 21 | 0.41 |
| Do you have regular physical examination once every year? (regular physical examination) | 15 | 0.29 |
| Physical and mental health-related information | |  |
| Do you have any difficulty with your hearing (hearing impairment) | 11 | 0.21 |
| Can you see the break in the circle (visual impairment) | 40 | 0.78 |
| Number of natural teeth (teeth loss) | 42 | 0.82 |
| Suffering from hypertension | 64 | 1.25 |
| Suffering from diabetes | 44 | 0.86 |
| Suffering from bronchitis, emphysema, pneumonia, asthma | 11 | 0.21 |
| Suffering from tuberculosis | 20 | 0.39 |
| Suffering from cataract | 56 | 1.09 |
| Suffering from glaucoma | 1297 | 25.33 |
| Suffering from cancer | 58 | 1.13 |
| Suffering from gastric or duodenal ulcer | 1310 | 25.59 |
| Suffering from Parkinson’s disease | 75 | 1.46 |
| Suffering from arthritis | 45 | 0.88 |
| Suffering from dementia | 25 | 0.49 |
| Suffering from epilepsy | 1271 | 24.82 |
| Suffering from cholecystitis, cholelith disease? | 1294 | 25.27 |
| Suffering from blood disease | 258 | 5.04 |
| Suffering from rheumatism or rheumatoid disease | 1302 | 25.43 |
| Suffering from chronic nephritis | 76 | 1.48 |
| Suffering from hepatitis | 1315 | 25.68 |
| Depressive symptoms |  |  |
| Have you felt sad, blue, or depressed for two weeks or more in last 12 months | 289 | 5.64 |
| Have you lost interest in most things like hobbies, work, or similar activities | 485 | 9.47 |
| Basic activities of daily living |  |  |
| Bathing | 13 | 0.25 |
| Dressing | 25 | 0.49 |
| Toileting | 13 | 0.25 |
| Indoor transferring | 28 | 0.55 |
| Continence | 7 | 0.14 |
| Feeding | 53 | 1.04 |
| The mini-mental state examination |  |  |
| What time of day is it right now | 3 | 0.06 |
| What is the animal year of this year | 2 | 0.04 |
| What is the date of the mid-autumn festival | 2 | 0.04 |
| What is the season right now | 2 | 0.04 |
| What is the name of this county or district | 4 | 0.08 |
| # of kinds of food named in one minute | 79 | 1.54 |
| Repeat the name of "apple" at first attempt | 10 | 0.2 |
| Repeat the name of "clothes" at first attempt | 12 | 0.23 |
| $20-$3=? | 1 | 0.02 |
| $20-$3-$3=? | 3 | 0.06 |
| $20-$3-$3-$3= | 3 | 0.06 |
| $20-$3-$3-$3-$3= | 4 | 0.08 |
| $20-$3-$3-$3-$3-$3= | 21 | 0.41 |
| Draw the figure following the example | 473 | 9.24 |
| Repeat the name of "table" a while later | 7 | 0.14 |
| Repeat the name of "apple" a while later | 7 | 0.14 |
| Repeat the name of "clothes" a while later | 8 | 0.16 |
| Name "pen" | 2 | 0.04 |
| Name "watch" | 7 | 0.14 |
| Repeat a sentence | 10 | 0.2 |
| Taking paper using right hand | 8 | 0.16 |
| Fold paper | 1 | 0.02 |
| Put paper on the floor | 1 | 0.02 |
| Physical measurement |  |  |
| Weight | 162 | 3.16 |
| Height | 151 | 2.95 |

**Abbreviations in the following Tables**

SWB: subjective well-being; CVD: cardiovascular disease; S.E: standard error; RR: relative risk; CI: confidence interval; SD: standard deviation; BMI: body mass index; DD score: diversity of dietary score; MMSE score: the mini-mental state examination score; BADL score: basic activity of daily living score; MCCs: multiple chronic conditions

**Supplementary Table 3** The association between SWB and the risk of CVD among Chinese older adults suggested by hierarchical regression based on modified Poisson regressions

| Models | Variables | Coefficient | S.E | RR (95% CI) | P-value |
| --- | --- | --- | --- | --- | --- |
| Model 1 | SWB (per 1-SD) | -0.085 | 0.032 | 0.918 (0.863 to 0.977) | 0.007 |
| Model 2 | SWB (per 1-SD) | -0.133 | 0.033 | 0.876 (0.821 to 0.934) | < 0.001 |
| Age | -0.007 | 0.003 | 0.993 (0.986 to 1.000) | 0.044 |
| Sex |  |  |  |  |
| Male | Reference |  |  |  |
| Female | -0.064 | 0.076 | 0.938 (0.809 to 1.089) | 0.401 |
| Nation |  |  |  |  |
| Han | Reference |  |  |  |
| Minority | -0.384 | 0.167 | 0.681 (0.491 to 0.945) | 0.021 |
| Residence |  |  |  |  |
| Rural | Reference |  |  |  |
| Urban | 0.078 | 0.068 | 1.081 (0.946 to 1.234) | 0.252 |
| Marital status |  |  |  |  |
| Married | Reference |  |  |  |
| Others | 0.039 | 0.079 | 1.039 (0.891 to 1.213) | 0.619 |
| Education |  |  |  |  |
| 0 years | Reference |  |  |  |
| 1-6 years | -0.007 | 0.083 | 0.993 (0.844 to 1.167) | 0.928 |
| ≥ 7 years | -0.120 | 0.122 | 0.887 (0.699 to 1.126) | 0.324 |
| *Occupation |  |  |  |  |
| Category 1 | Reference |  |  |  |
| Category 2 | 0.304 | 0.102 | 1.355 (1.109 to 1.657) | 0.003 |
| Category 3 | 0.166 | 0.105 | 1.181 (0.961 to 1.451) | 0.113 |
| Pension |  |  |  |  |
| No | Reference |  |  |  |
| Yes | 0.186 | 0.107 | 1.205 (0.977 to 1.485) | 0.081 |
| Model 3 | SWB (per 1-SD) | -0.121 | 0.035 | 0.886 (0.828 to 0.949) | 0.001 |
| Age | -0.007 | 0.004 | 0.993 (0.985 to 1.000) | 0.067 |
| Sex |  |  |  |  |
| Male | Reference |  |  |  |
| Female | -0.013 | 0.086 | 0.987 (0.834 to 1.169) | 0.884 |
| Nation |  |  |  |  |
| Han | Reference |  |  |  |
| Minority | -0.362 | 0.165 | 0.696 (0.505 to 0.962) | 0.028 |
| Residence |  |  |  |  |
| Rural | Reference |  |  |  |
| Urban | 0.022 | 0.071 | 1.022 (0.889 to 1.175) | 0.762 |
| Marital status |  |  |  |  |
| Married | Reference |  |  |  |
| Others | 0.023 | 0.079 | 1.023 (0.876 to 1.194) | 0.775 |
| Education |  |  |  |  |
| 0 years | Reference |  |  |  |
| 1-6 years | -0.003 | 0.082 | 0.997 (0.849 to 1.171) | 0.972 |
| ≥ 7 years | -0.107 | 0.121 | 0.899 (0.708 to 1.140) | 0.377 |
| *Occupation |  |  |  |  |
| Category 1 | Reference |  |  |  |
| Category 2 | 0.274 | 0.104 | 1.315 (1.073 to 1.613) | 0.008 |
| Category 3 | 0.139 | 0.105 | 1.149 (0.935 to 1.412) | 0.186 |
| Pension |  |  |  |  |
| No | Reference |  |  |  |
| Yes | 0.14 | 0.11 | 1.150 (0.927 to 1.426) | 0.204 |
| Mildew odor at home |  |  |  |  |
| Yes | Reference |  |  |  |
| No | 0.026 | 0.084 | 1.026 (0.870 to 1.21) | 0.760 |
| Cooking fuels |  |  |  |  |
| Clean fuels | Reference |  |  |  |
| Solid fuels | -0.076 | 0.076 | 0.927 (0.799 to 1.076) | 0.320 |
| Other fuels | 0.135 | 0.121 | 1.145 (0.903 to 1.451) | 0.264 |
| BMI | 0.031 | 0.007 | 1.031(1.017 to 1.045) | <0.001 |
| Smoking status |  |  |  |  |
| Never | Reference |  |  |  |
| Ever | 0.260 | 0.091 | 1.297 (1.085 to 1.551) | 0.004 |
| Currently | 0.023 | 0.095 | 1.023 (0.850 to 1.232) | 0.807 |
| Drinking status |  |  |  |  |
| Never | Reference |  |  |  |
| Ever | 0.158 | 0.09 | 1.171 (0.982 to 1.397) | 0.078 |
| Currently | -0.067 | 0.094 | 0.935 (0.778 to 1.124) | 0.475 |
| Duration of sleep |  |  |  |  |
| 6-8 hours | Reference |  |  |  |
| < 6 hours | 0.060 | 0.09 | 1.062 (0.890 to 1.267) | 0.508 |
| > 8 hours | -0.069 | 0.075 | 0.933 (0.807 to 1.081) | 0.357 |
| Activities score | -0.009 | 0.006 | 0.991 (0.978 to 1.004) | 0.165 |
| Regular exercise |  |  |  |  |
| Never | Reference |  |  |  |
| Ever | 0.240 | 0.099 | 1.271 (1.047 to 1.545) | 0.015 |
| Currently | 0.101 | 0.078 | 1.106 (0.949 to 1.289) | 0.197 |
| DD score | -0.018 | 0.018 | 0.982 (0.948 to 1.017) | 0.304 |
| Model 4 | SWB (per 1-SD) | -0.134 | 0.036 | 0.875 (0.815 to 0.938) | <0.001 |
| Age | -0.007 | 0.004 | 0.993 (0.985 to 1.001) | 0.074 |
| Sex |  |  |  |  |
| Male | Reference |  |  |  |
| Female | -0.010 | 0.086 | 0.990 (0.837 to 1.172) | 0.908 |
| Nation |  |  |  |  |
| Han | Reference |  |  |  |
| Minority | -0.350 | 0.165 | 0.705 (0.510 to 0.973) | 0.034 |
| Residence |  |  |  |  |
| Rural | Reference |  |  |  |
| Urban | 0.022 | 0.071 | 1.022 (0.890 to 1.175) | 0.754 |
| Marital status |  |  |  |  |
| Married | Reference |  |  |  |
| Others | 0.026 | 0.079 | 1.026 (0.880 to 1.197) | 0.745 |
| Education |  |  |  |  |
| 0 years | Reference |  |  |  |
| 1-6 years | 0.004 | 0.082 | 1.004 (0.855 to 1.181) | 0.956 |
| ≥ 7 years | -0.101 | 0.122 | 0.904 (0.712 to 1.147) | 0.405 |
| *Occupation |  |  |  |  |
| Category 1 | Reference |  |  |  |
| Category 2 | 0.276 | 0.104 | 1.318 (1.076 to 1.616) | 0.008 |
| Category 3 | 0.142 | 0.105 | 1.153 (0.937 to 1.416) | 0.178 |
| Pension |  |  |  |  |
| No | Reference |  |  |  |
| Yes | 0.131 | 0.110 | 1.140 (0.919 to 1.412) | 0.233 |
| Mildew odor at home |  |  |  |  |
| Yes | Reference |  |  |  |
| No | 0.003 | 0.084 | 1.003 (0.850 to 1.183) | 0.970 |
| Cooking fuels |  |  |  |  |
| Clean fuels | Reference |  |  |  |
| Solid fuels | -0.066 | 0.075 | 0.936 (0.807 to 1.085) | 0.380 |
| Other fuels | 0.133 | 0.121 | 1.142 (0.902 to 1.448) | 0.269 |
| BMI | 0.031 | 0.007 | 1.031 (1.018 to 1.045) | <0.001 |
| Smoking status |  |  |  |  |
| Never | Reference |  |  |  |
| Ever | 0.257 | 0.091 | 1.293 (1.083 to 1.545) | 0.005 |
| Currently | 0.032 | 0.095 | 1.033 (0.857 to 1.244) | 0.734 |
| Drinking status |  |  |  |  |
| Never | Reference |  |  |  |
| Ever | 0.154 | 0.090 | 1.166 (0.978 to 1.391) | 0.086 |
| Currently | -0.076 | 0.094 | 0.927 (0.771 to 1.114) | 0.417 |
| Duration of sleep |  |  |  |  |
| 6-8 hours | Reference |  |  |  |
| < 6 hours | 0.068 | 0.090 | 1.070 (0.898 to 1.278) | 0.449 |
| > 8 hours | -0.064 | 0.075 | 0.938 (0.811 to 1.087) | 0.395 |
| Activities score | -0.010 | 0.007 | 0.990 (0.977 to 1.003) | 0.127 |
| Regular exercise |  |  |  |  |
| Never | Reference |  |  |  |
| Ever | 0.240 | 0.099 | 1.271 (1.047 to 1.545) | 0.015 |
| Currently | 0.097 | 0.078 | 1.102 (0.946 to 1.284) | 0.213 |
| DD score | -0.023 | 0.018 | 0.977 (0.944 to 1.012) | 0.193 |
| Adequate medical care |  |  |  |  |
| Yes | Reference |  |  |  |
| No | -0.486 | 0.189 | 0.615 (0.425 to 0.89) | 0.010 |
| Regular physical examination | |  |  |  |
| Yes | Reference |  |  |  |
| No | -0.104 | 0.069 | 0.901 (0.787 to 1.031) | 0.132 |
| Model 5 | SWB (per 1-SD) | -0.111 | 0.037 | 0.895 (0.833 to 0.962) | 0.002 |
| Age | -0.006 | 0.004 | 0.994 (0.986 to 1.003) | 0.189 |
| Sex |  |  |  |  |
| Male | Reference |  |  |  |
| Female | -0.027 | 0.086 | 0.973 (0.822 to 1.153) | 0.757 |
| Nation |  |  |  |  |
| Han | Reference |  |  |  |
| Minority | -0.357 | 0.165 | 0.700 (0.506 to 0.967) | 0.031 |
| Residence |  |  |  |  |
| Rural | Reference |  |  |  |
| Urban | 0.030 | 0.071 | 1.030 (0.897 to 1.184) | 0.672 |
| Marital status |  |  |  |  |
| Married | Reference |  |  |  |
| Others | 0.018 | 0.079 | 1.018 (0.873 to 1.189) | 0.817 |
| Education |  |  |  |  |
| 0 years | Reference |  |  |  |
| 1-6 years | 0.012 | 0.083 | 1.012 (0.861 to 1.189) | 0.889 |
| ≥ 7 years | -0.090 | 0.122 | 0.914 (0.720 to 1.161) | 0.461 |
| *Occupation |  |  |  |  |
| Category 1 | Reference |  |  |  |
| Category 2 | 0.272 | 0.104 | 1.313 (1.069 to 1.610) | 0.009 |
| Category 3 | 0.130 | 0.105 | 1.139 (0.927 to 1.398) | 0.217 |
| Pension |  |  |  |  |
| No | Reference |  |  |  |
| Yes | 0.120 | 0.110 | 1.127 (0.908 to 1.399) | 0.275 |
| Mildew odor at home |  |  |  |  |
| Yes | Reference |  |  |  |
| No | 0.028 | 0.084 | 1.028 (0.872 to 1.213) | 0.74 |
| Cooking fuels |  |  |  |  |
| Clean fuels | Reference |  |  |  |
| Solid fuels | -0.056 | 0.076 | 0.946 (0.815 to 1.096) | 0.46 |
| Other fuels | 0.136 | 0.119 | 1.146 (0.907 to 1.449) | 0.253 |
| BMI | 0.030 | 0.007 | 1.030 (1.017 to 1.044) | <0.001 |
| Smoking status |  |  |  |  |
| Never | Reference |  |  |  |
| Ever | 0.268 | 0.091 | 1.307 (1.094 to 1.564) | 0.003 |
| Currently | 0.041 | 0.095 | 1.042 (0.864 to 1.255) | 0.671 |
| Drinking status |  |  |  |  |
| Never | Reference |  |  |  |
| Ever | 0.141 | 0.090 | 1.151 (0.966 to 1.373) | 0.116 |
| Currently | -0.079 | 0.094 | 0.924 (0.769 to 1.111) | 0.399 |
| Duration of sleep |  |  |  |  |
| 6-8 hours | Reference |  |  |  |
| < 6 hours | 0.045 | 0.09 | 1.046 (0.876 to 1.249) | 0.615 |
| > 8 hours | -0.079 | 0.075 | 0.924 (0.798 to 1.070) | 0.294 |
| Activities score | -0.011 | 0.007 | 0.989 (0.976 to 1.003) | 0.116 |
| Regular exercise |  |  |  |  |
| Never | Reference |  |  |  |
| Ever | 0.224 | 0.099 | 1.251 (1.031 to 1.517) | 0.023 |
| Currently | 0.084 | 0.078 | 1.088(0.933-1.267) | 0.281 |
| DD score | -0.020 | 0.018 | 0.980 (0.946 to 1.015) | 0.264 |
| Adequate medical care |  |  |  |  |
| Yes | Reference |  |  |  |
| No | -0.478 | 0.189 | 0.620 (0.428 to 0.897) | 0.011 |
| Regular physical examination | |  |  |  |
| Yes | Reference |  |  |  |
| No | -0.098 | 0.069 | 0.907 (0.791 to 1.038) | 0.154 |
| Hearing impairment |  |  |  |  |
| Yes | Reference |  |  |  |
| No | 0.046 | 0.073 | 1.047 (0.908 to 1.209) | 0.526 |
| Visual impairment |  |  |  |  |
| No | Reference |  |  |  |
| Yes | -0.123 | 0.092 | 0.884 (0.739 to 1.059) | 0.181 |
| Teeth loss |  |  |  |  |
| No | Reference |  |  |  |
| Yes | 0.071 | 0.122 | 1.074 (0.845 to 1.363) | 0.564 |
| Depressive symptoms |  |  |  |  |
| No | Reference |  |  |  |
| Yes | 0.178 | 0.082 | 1.195 (1.017 to 1.404) | 0.031 |
| MMSE score | -0.009 | 0.006 | 0.991(0.979 to 1.004) | 0.170 |
| BADL score | 0.018 | 0.022 | 1.018 (0.975 to 1.062) | 0.418 |
| MCCs |  |  |  |  |
| No | Reference |  |  |  |
| Yes | 0.175 | 0.071 | 1.191 (1.037 to 1.37) | 0.014 |

*Category 1: staff of farming/forestry/animal husbandry/side-line production/fishery; Category 2: workers/teachers/doctors/military/government workers/businessmen; Category 3: others

**Supplementary Table 4** The association between SWB and the risk of CVD among Chinese older adults with healthy BMI suggested by multivariable modified Poisson regressions

| Variables | Coefficient | S.E | RR (95%CI) | P-value |
| --- | --- | --- | --- | --- |
| SWB (per 1-SD) | -0.171 | 0.053 | 0.843 (0.760 to 0.935) | 0.001 |
| Age | -0.003 | 0.006 | 0.997 (0.985 to 1.008) | 0.572 |
| Sex |  |  |  |  |
| Male | Reference |  |  |  |
| Female | -0.094 | 0.123 | 0.910 (0.715 to 1.158) | 0.444 |
| Nation |  |  |  |  |
| Han | Reference |  |  |  |
| Minority | -0.419 | 0.239 | 0.658 (0.412 to 1.051) | 0.080 |
| Residence |  |  |  |  |
| Rural | Reference |  |  |  |
| Urban | 0.111 | 0.100 | 1.117 (0.919 to 1.359) | 0.265 |
| Marital status |  |  |  |  |
| Married | Reference |  |  |  |
| Others | -0.037 | 0.109 | 0.964 (0.779 to 1.192) | 0.736 |
| Education |  |  |  |  |
| 0 years | Reference |  |  |  |
| 1-6 years | -0.026 | 0.115 | 0.974 (0.778 to 1.221) | 0.822 |
| ≥ 7 years | 0.012 | 0.173 | 1.012 (0.721 to 1.420) | 0.945 |
| *Occupation |  |  |  |  |
| Category 1 | Reference |  |  |  |
| Category 2 | 0.280 | 0.141 | 1.323 (1.004 to 1.744) | 0.047 |
| Category 3 | -0.104 | 0.166 | 0.901 (0.652 to 1.247) | 0.531 |
| Pension |  |  |  |  |
| No | Reference |  |  |  |
| Yes | 0.045 | 0.150 | 1.046 (0.78-1.404) | 0.765 |
| Mildew odor at home |  |  |  |  |
| Yes | Reference |  |  |  |
| No | -0.045 | 0.115 | 0.956(0.763 to 1.198) | 0.698 |
| Cooking fuels |  |  |  |  |
| Clean fuels | Reference |  |  |  |
| Solid fuels | -0.116 | 0.108 | 0.890 (0.721 to 1.100) | 0.283 |
| Other fuels | 0.144 | 0.166 | 1.155(0.834 to 1.600) | 0.387 |
| Smoking status |  |  |  |  |
| Never | Reference |  |  |  |
| Ever | 0.217 | 0.13 | 1.242 (0.964 to 1.602) | 0.095 |
| Currently | 0.159 | 0.132 | 1.172 (0.905 to 1.519) | 0.229 |
| Drinking status |  |  |  |  |
| Never | Reference |  |  |  |
| Ever | 0.201 | 0.122 | 1.223 (0.962 to 1.553) | 0.101 |
| Currently | -0.171 | 0.129 | 0.843 (0.654 to 1.085) | 0.186 |
| Duration of sleep |  |  |  |  |
| 6-8 hours | Reference |  |  |  |
| < 6 hours | 0.008 | 0.130 | 1.008 (0.782 to 1.300) | 0.951 |
| > 8 hours | -0.104 | 0.105 | 0.901 (0.734 to 1.106) | 0.322 |
| Activities score | -0.017 | 0.01 | 0.983 (0.965 to 1.003) | 0.095 |
| Regular exercise |  |  |  |  |
| Never | Reference |  |  |  |
| Ever | 0.143 | 0.146 | 1.154 (0.866 to 1.537) | 0.327 |
| Currently | 0.063 | 0.109 | 1.065 (0.862 to 1.318) | 0.56 |
| DD score | -0.018 | 0.025 | 0.982 (0.935 to 1.031) | 0.477 |
| Adequate medical care |  |  |  |  |
| Yes | Reference |  |  |  |
| No | -0.312 | 0.225 | 0.732 (0.470 to 1.138) | 0.165 |
| Regular physical examination |  |  |  |  |
| Yes | Reference |  |  |  |
| No | -0.149 | 0.096 | 0.862 (0.714 to 1.040) | 0.120 |
| Hearing impairment |  |  |  |  |
| Yes | Reference |  |  |  |
| No | 0.015 | 0.101 | 1.015 (0.832 to 1.239) | 0.882 |
| Visual impairment |  |  |  |  |
| No | Reference |  |  |  |
| Yes | -0.225 | 0.137 | 0.799 (0.611 to 1.044) | 0.100 |
| Teeth loss |  |  |  |  |
| No | Reference |  |  |  |
| Yes | -0.026 | 0.172 | 0.974 (0.696 to 1.363) | 0.880 |
| Depressive symptoms |  |  |  |  |
| No | Reference |  |  |  |
| Yes | 0.225 | 0.116 | 1.252 (0.998 to 1.571) | 0.052 |
| MMSE score | -0.025 | 0.009 | 0.975 (0.959 to 0.992) | 0.005 |
| BADL score | 0.110 | 0.04 | 1.116 (1.033 to 1.206) | 0.005 |
| MCCs |  |  |  |  |
| No | Reference |  |  |  |
| Yes | 0.225 | 0.099 | 1.252 (1.031 to 1.52) | 0.023 |

*Category 1: staff of farming/forestry/animal husbandry/side-line production/fishery; Category 2: workers/teachers/doctors/military/government workers/businessmen; Category 3: others

**Supplementary Table 5** The association between SWB and the risk of CVD among Chinese older adults with unhealthy BMI suggested by multivariable modified Poisson regressions

| Variables | Coefficient | S.E | RR (95%CI) | P-value |
| --- | --- | --- | --- | --- |
| SWB (per 1-SD) | -0.053 | 0.052 | 0.948 (0.857 to 1.049) | 0.307 |
| Age | -0.011 | 0.006 | 0.989 (0.977 to 1.001) | 0.072 |
| Sex |  |  |  |  |
| Male | Reference |  |  |  |
| Female | 0.022 | 0.124 | 1.022 (0.801 to 1.305) | 0.860 |
| Nation |  |  |  |  |
| Han | Reference |  |  |  |
| Minority | -0.327 | 0.228 | 0.721 (0.461 to 1.126) | 0.151 |
| Residence |  |  |  |  |
| Rural | Reference |  |  |  |
| Urban | -0.014 | 0.101 | 0.986 (0.810 to 1.202) | 0.892 |
| Marital status |  |  |  |  |
| Married | Reference |  |  |  |
| Others | 0.064 | 0.115 | 1.066 (0.851 to 1.335) | 0.577 |
| Education |  |  |  |  |
| 0 years | Reference |  |  |  |
| 1-6 years | 0.047 | 0.121 | 1.048 (0.827 to 1.330) | 0.697 |
| ≥ 7 years | -0.225 | 0.173 | 0.799 (0.569 to 1.122) | 0.195 |
| *Occupation |  |  |  |  |
| Category 1 | Reference |  |  |  |
| Category 2 | 0.240 | 0.153 | 1.271 (0.943 to 1.716) | 0.115 |
| Category 3 | 0.293 | 0.139 | 1.340 (1.021 to 1.758) | 0.035 |
| Pension |  |  |  |  |
| No | Reference |  |  |  |
| Yes | 0.224 | 0.159 | 1.251 (0.917 to 1.707) | 0.157 |
| Mildew odor at home |  |  |  |  |
| Yes | Reference |  |  |  |
| No | 0.114 | 0.125 | 1.121 (0.878 to 1.430) | 0.359 |
| Cooking fuels |  |  |  |  |
| Clean fuels | Reference |  |  |  |
| Solid fuels | -0.009 | 0.106 | 0.991 (0.804 to 1.220) | 0.931 |
| Other fuels | 0.154 | 0.172 | 1.166 (0.833 to 1.632) | 0.371 |
| Smoking status |  |  |  |  |
| Never | Reference |  |  |  |
| Ever | 0.262 | 0.129 | 1.3(1.009-1.674) | 0.042 |
| Currently | -0.121 | 0.141 | 0.886 (0.672 to 1.168) | 0.391 |
| Drinking status |  |  |  |  |
| Never | Reference |  |  |  |
| Ever | 0.073 | 0.133 | 1.076 (0.828 to 1.397) | 0.586 |
| Currently | 0.030 | 0.134 | 1.030 (0.792 to 1.342) | 0.822 |
| Duration of sleep |  |  |  |  |
| 6-8 hours | Reference |  |  |  |
| < 6 hours | 0.063 | 0.126 | 1.065 (0.832 to 1.365) | 0.615 |
| > 8 hours | -0.072 | 0.108 | 0.931 (0.753 to 1.15) | 0.506 |
| Activities score | -0.002 | 0.009 | 0.998 (0.979 to 1.016) | 0.815 |
| Regular exercise |  |  |  |  |
| Never | Reference |  |  |  |
| Ever | 0.284 | 0.135 | 1.328 (1.019 to 1.733) | 0.036 |
| Currently | 0.114 | 0.113 | 1.121 (0.899 to 1.398) | 0.310 |
| DD score | -0.011 | 0.025 | 0.989 (0.943 to 1.038) | 0.657 |
| Adequate medical care |  |  |  |  |
| Yes | Reference |  |  |  |
| No | -0.821 | 0.343 | 0.440 (0.224 to 0.862) | 0.017 |
| Regular physical examination |  |  |  |  |
| Yes | Reference |  |  |  |
| No | -0.029 | 0.100 | 0.971 (0.799 to 1.183) | 0.773 |
| Hearing impairment |  |  |  |  |
| Yes | Reference |  |  |  |
| No | 0.087 | 0.106 | 1.091 (0.887 to 1.343) | 0.410 |
| Visual impairment |  |  |  |  |
| No | Reference |  |  |  |
| Yes | -0.025 | 0.126 | 0.975 (0.762 to 1.249) | 0.841 |
| Teeth loss |  |  |  |  |
| No | Reference |  |  |  |
| Yes | 0.118 | 0.175 | 1.125 (0.799 to 1.586) | 0.500 |
| Depressive symptoms |  |  |  |  |
| No | Reference |  |  |  |
| Yes | 0.090 | 0.119 | 1.094 (0.866 to 1.383) | 0.452 |
| MMSE score | 0.009 | 0.009 | 1.009 (0.991 to 1.027) | 0.314 |
| BADL score | -0.039 | 0.026 | 0.962 (0.914 to 1.013) | 0.142 |
| MCCs |  |  |  |  |
| No | Reference |  |  |  |
| Yes | 0.156 | 0.101 | 1.169 (0.96 to 1.425) | 0.121 |

*Category 1: staff of farming/forestry/animal husbandry/side-line production/fishery; Category 2: workers/teachers/doctors/military/government workers/businessmen; Category 3: others

**Supplementary Table 6** The association between SWB and the risk of CVD among Chinese older adults never smoking suggested by multivariable modified Poisson regressions

| Variables | Coefficient | S.E | RR (95% CI) | P-value |
| --- | --- | --- | --- | --- |
| SWB (per 1-SD) | -0.120 | 0.048 | 0.887 (0.808 to 0.974) | 0.012 |
| Age | -0.007 | 0.005 | 0.993 (0.982 to 1.003) | 0.183 |
| Sex |  |  |  |  |
| Male | Reference |  |  |  |
| Female | -0.014 | 0.106 | 0.986 (0.801 to 1.214) | 0.893 |
| Nation |  |  |  |  |
| Han | Reference |  |  |  |
| Minority | -0.402 | 0.205 | 0.669 (0.447 to 1.000) | 0.05 |
| Residence |  |  |  |  |
| Rural | Reference |  |  |  |
| Urban | 0.035 | 0.093 | 1.036 (0.863 to 1.242) | 0.706 |
| Marital status |  |  |  |  |
| Married | Reference |  |  |  |
| Others | 0.100 | 0.104 | 1.105 (0.900 to 1.355) | 0.340 |
| Education |  |  |  |  |
| 0 years | Reference |  |  |  |
| 1-6 years | 0.100 | 0.111 | 1.105 (0.890 to 1.372) | 0.367 |
| ≥ 7 years | 0.115 | 0.167 | 1.122 (0.809 to 1.556) | 0.491 |
| *Occupation |  |  |  |  |
| Category 1 | Reference |  |  |  |
| Category 2 | 0.293 | 0.148 | 1.340 (1.003 to 1.791) | 0.048 |
| Category 3 | 0.135 | 0.129 | 1.145 (0.889 to 1.474) | 0.295 |
| Pension |  |  |  |  |
| No | Reference |  |  |  |
| Yes | 0.216 | 0.156 | 1.241 (0.915 to 1.685) | 0.165 |
| Mildew odor at home |  |  |  |  |
| Yes | Reference |  |  |  |
| No | -0.020 | 0.106 | 0.980 (0.796 to 1.207) | 0.848 |
| Cooking fuels |  |  |  |  |
| Clean fuels | Reference |  |  |  |
| Solid fuels | 0.032 | 0.101 | 1.033 (0.847 to 1.259) | 0.751 |
| Other fuels | 0.113 | 0.162 | 1.120 (0.815 to 1.539) | 0.486 |
| BMI | 0.030 | 0.008 | 1.030 (1.014 to 1.047) | <0.001 |
| Drinking status |  |  |  |  |
| Never | Reference |  |  |  |
| Ever | -0.167 | 0.168 | 0.846 (0.609 to 1.175) | 0.319 |
| Currently | 0.024 | 0.133 | 1.024 (0.791 to 1.328) | 0.854 |
| Duration of sleep |  |  |  |  |
| 6-8 hours | Reference |  |  |  |
| < 6 hours | 0.046 | 0.115 | 1.047 (0.836 to 1.310) | 0.691 |
| > 8 hours | -0.064 | 0.099 | 0.938 (0.773 to 1.139) | 0.519 |
| Activities score | -0.012 | 0.009 | 0.988 (0.970 to 1.007) | 0.215 |
| Regular exercise |  |  |  |  |
| Never | Reference |  |  |  |
| Ever | 0.340 | 0.128 | 1.405 (1.092 to 1.808) | 0.008 |
| Currently | 0.109 | 0.102 | 1.115 (0.913 to 1.362) | 0.287 |
| DD score | -0.049 | 0.023 | 0.952 (0.911 to 0.996) | 0.033 |
| Adequate medical care |  |  |  |  |
| Yes | Reference |  |  |  |
| No | -0.692 | 0.265 | 0.501 (0.297 to 0.842) | 0.009 |
| Regular physical examination | |  |  |  |
| Yes | Reference |  |  |  |
| No | -0.059 | 0.094 | 0.943 (0.784 to 1.134) | 0.534 |
| Hearing impairment |  |  |  |  |
| Yes | Reference |  |  |  |
| No | 0.041 | 0.094 | 1.042 (0.866 to 1.252) | 0.667 |
| Visual impairment |  |  |  |  |
| No | Reference |  |  |  |
| Yes | -0.138 | 0.114 | 0.871 (0.696 to 1.089) | 0.225 |
| Teeth loss |  |  |  |  |
| No | Reference |  |  |  |
| Yes | 0.049 | 0.166 | 1.050 (0.759 to 1.455) | 0.766 |
| Depressive symptoms |  |  |  |  |
| No | Reference |  |  |  |
| Yes | 0.210 | 0.107 | 1.234 (1.001 to 1.520) | 0.049 |
| MMSE score | -0.004 | 0.008 | 0.996 (0.981 to 1.011) | 0.613 |
| BADL score | 0.018 | 0.026 | 1.018 (0.968 to 1.071) | 0.487 |
| MCCs |  |  |  |  |
| No | Reference |  |  |  |
| Yes | 0.148 | 0.093 | 1.160 (0.967 to 1.391) | 0.111 |

*Category 1: staff of farming/forestry/animal husbandry/side-line production/fishery; Category 2: workers/teachers/doctors/military/government workers/businessmen; Category 3: others

**Supplementary Table 7** The association between SWB and the risk of CVD among Chinese older adults ever or currently smoking suggested by multivariable modified Poisson regressions

| Variables | Coefficient | S.E | RR (95%CI) | P-value |
| --- | --- | --- | --- | --- |
| SWB (per 1-SD) | -0.084 | 0.057 | 0.919 (0.823 to 1.028) | 0.142 |
| Age | -0.001 | 0.007 | 0.999 (0.985 to 1.013) | 0.913 |
| Sex |  |  |  |  |
| Male | Reference |  |  |  |
| Female | -0.026 | 0.147 | 0.974 (0.730 to 1.300) | 0.859 |
| Nation |  |  |  |  |
| Han | Reference |  |  |  |
| Minority | -0.293 | 0.281 | 0.746 (0.430 to 1.294) | 0.297 |
| Residence |  |  |  |  |
| Rural | Reference |  |  |  |
| Urban | 0.026 | 0.112 | 1.026 (0.824 to 1.279) | 0.817 |
| Marital status |  |  |  |  |
| Married | Reference |  |  |  |
| Others | -0.106 | 0.122 | 0.899 (0.709 to 1.142) | 0.386 |
| Education |  |  |  |  |
| 0 years | Reference |  |  |  |
| 1-6 years | -0.094 | 0.121 | 0.91(0.717 to 1.155) | 0.437 |
| ≥ 7 years | -0.276 | 0.174 | 0.759 (0.540 to 1.067) | 0.113 |
| *Occupation |  |  |  |  |
| Category 1 | Reference |  |  |  |
| Category 2 | 0.221 | 0.143 | 1.247 (0.942 to 1.652) | 0.123 |
| Category 3 | 0.151 | 0.179 | 1.163 (0.819 to 1.65) | 0.400 |
| Pension |  |  |  |  |
| No | Reference |  |  |  |
| Yes | 0.035 | 0.150 | 1.036 (0.772 to 1.391) | 0.813 |
| Mildew odor at home |  |  |  |  |
| Yes | Reference |  |  |  |
| No | 0.143 | 0.140 | 1.154 (0.876 to 1.519) | 0.308 |
| Cooking fuels |  |  |  |  |
| Clean fuels | Reference |  |  |  |
| Solid fuels | -0.151 | 0.115 | 0.86(0.686 to 1.077) | 0.189 |
| Other fuels | 0.197 | 0.175 | 1.218 (0.863 to 1.718) | 0.262 |
| BMI | 0.029 | 0.012 | 1.029 (1.006 to 1.053) | 0.013 |
| Drinking status |  |  |  |  |
| Never | Reference |  |  |  |
| Ever | 0.308 | 0.118 | 1.361 (1.081 to 1.714) | 0.009 |
| Currently | -0.143 | 0.130 | 0.867 (0.672 to 1.117) | 0.270 |
| Duration of sleep |  |  |  |  |
| 6-8 hours | Reference |  |  |  |
| < 6 hours | 0.040 | 0.149 | 1.041 (0.776 to 1.394) | 0.791 |
| > 8 hours | -0.114 | 0.116 | 0.892 (0.712 to 1.120) | 0.324 |
| Activities score | -0.011 | 0.010 | 0.989 (0.969 to 1.009) | 0.285 |
| Regular exercise |  |  |  |  |
| Never | Reference |  |  |  |
| Ever | 0.029 | 0.153 | 1.029 (0.763 to 1.391) | 0.848 |
| Currently | 0.056 | 0.119 | 1.058 (0.838 to 1.336) | 0.637 |
| DD score | 0.024 | 0.029 | 1.024 (0.968 to 1.084) | 0.404 |
| Adequate medical care |  |  |  |  |
| Yes | Reference |  |  |  |
| No | -0.242 | 0.270 | 0.785 (0.463 to 1.332) | 0.371 |
| Regular physical examination |  |  |  |  |
| Yes | Reference |  |  |  |
| No | -0.162 | 0.102 | 0.850 (0.696 to 1.039) | 0.112 |
| Hearing impairment |  |  |  |  |
| Yes | Reference |  |  |  |
| No | 0.045 | 0.115 | 1.046 (0.835 to 1.311) | 0.692 |
| Visual impairment |  |  |  |  |
| No | Reference |  |  |  |
| Yes | -0.124 | 0.160 | 0.883(0.645 to 1.208) | 0.437 |
| Teeth loss |  |  |  |  |
| No | Reference |  |  |  |
| Yes | 0.097 | 0.184 | 1.102 (0.768 to 1.581) | 0.599 |
| Depressive symptoms |  |  |  |  |
| No | Reference |  |  |  |
| Yes | 0.166 | 0.131 | 1.181 (0.913 to 1.528) | 0.206 |
| MMSE score | -0.019 | 0.012 | 0.981 (0.959 to 1.004) | 0.112 |
| BADL score | 0.014 | 0.038 | 1.014 (0.940 to 1.093) | 0.724 |
| MCCs |  |  |  |  |
| No | Reference |  |  |  |
| Yes | 0.217 | 0.110 | 1.242 (1.002 to 1.539) | 0.048 |

*Category 1: staff of farming/forestry/animal husbandry/side-line production/fishery; Category 2: workers/teachers/doctors/military/government workers/businessmen; Category 3: others

**Supplementary Table 8** The association between SWB and the risk of CVD among Chinese older adults never drinking suggested by multivariable modified Poisson regressions

| Variables | Coefficient | S.E | RR (95%CI) | P-value |
| --- | --- | --- | --- | --- |
| SWB (per 1-SD) | -0.134 | 0.045 | 0.875 (0.801 to 0.956) | 0.003 |
| Age | -0.008 | 0.005 | 0.992(0.982 to 1.003) | 0.142 |
| Sex |  |  |  |  |
| Male | Reference |  |  |  |
| Female | -0.09 | 0.102 | 0.914 (0.748 to 1.116) | 0.379 |
| Nation |  |  |  |  |
| Han | Reference |  |  |  |
| Minority | -0.502 | 0.221 | 0.605 (0.392 to 0.934) | 0.023 |
| Residence |  |  |  |  |
| Rural | Reference |  |  |  |
| Urban | -0.061 | 0.090 | 0.941 (0.788 to 1.122) | 0.497 |
| Marital status |  |  |  |  |
| Married | Reference |  |  |  |
| Others | 0.046 | 0.100 | 1.047 (0.862 to 1.274) | 0.644 |
| Education |  |  |  |  |
| 0 years | Reference |  |  |  |
| 1-6 years | 0.132 | 0.105 | 1.141 (0.929 to 1.402) | 0.209 |
| ≥ 7 years | 0.195 | 0.154 | 1.215 (0.899 to 1.645) | 0.206 |
| *Occupation |  |  |  |  |
| Category 1 | Reference |  |  |  |
| Category 2 | 0.171 | 0.135 | 1.186 (0.911 to 1.545) | 0.205 |
| Category 3 | 0.103 | 0.127 | 1.108 (0.863 to 1.423) | 0.418 |
| Pension |  |  |  |  |
| No | Reference |  |  |  |
| Yes | 0.240 | 0.139 | 1.271 (0.968 to 1.669) | 0.085 |
| Mildew odor at home |  |  |  |  |
| Yes | Reference |  |  |  |
| No | 0.029 | 0.106 | 1.029 (0.835 to 1.267) | 0.789 |
| Cooking fuels |  |  |  |  |
| Clean fuels | Reference |  |  |  |
| Solid fuels | -0.082 | 0.097 | 0.921 (0.761 to 1.114) | 0.398 |
| Other fuels | 0.112 | 0.152 | 1.119 (0.831 to 1.505) | 0.461 |
| BMI | 0.023 | 0.009 | 1.023 (1.006 to 1.040) | 0.009 |
| Smoking status |  |  |  |  |
| Never | Reference |  |  |  |
| Ever | 0.164 | 0.129 | 1.178 (0.914 to 1.517) | 0.206 |
| Currently | -0.132 | 0.133 | 0.876 (0.674 to 1.138) | 0.321 |
| Duration of sleep |  |  |  |  |
| 6-8 hours | Reference |  |  |  |
| < 6 hours | 0.022 | 0.114 | 1.022 (0.818 to 1.278) | 0.846 |
| > 8 hours | -0.047 | 0.094 | 0.954 (0.793 to 1.148) | 0.615 |
| Activities score | -0.006 | 0.009 | 0.994 (0.976 to 1.011) | 0.478 |
| Regular exercise |  |  |  |  |
| Never | Reference |  |  |  |
| Ever | 0.428 | 0.118 | 1.534 (1.218 to 1.933) | <0.001 |
| Currently | 0.108 | 0.099 | 1.114 (0.918 to 1.354) | 0.275 |
| DD score | -0.035 | 0.022 | 0.966 (0.924 to 1.009) | 0.115 |
| Adequate medical care |  |  |  |  |
| Yes | Reference |  |  |  |
| No | -0.655 | 0.244 | 0.519 (0.322 to 0.839) | 0.007 |
| Regular physical examination |  |  |  |  |
| Yes | Reference |  |  |  |
| No | -0.085 | 0.089 | 0.919 (0.771 to 1.095) | 0.344 |
| Hearing impairment |  |  |  |  |
| Yes | Reference |  |  |  |
| No | 0.054 | 0.092 | 1.055 (0.882 to 1.264) | 0.552 |
| Visual impairment |  |  |  |  |
| No | Reference |  |  |  |
| Yes | -0.156 | 0.113 | 0.856 (0.686 to 1.068) | 0.168 |
| Teeth loss |  |  |  |  |
| No | Reference |  |  |  |
| Yes | 0.058 | 0.159 | 1.060 (0.776 to 1.446) | 0.715 |
| Depressive symptoms |  |  |  |  |
| No | Reference |  |  |  |
| Yes | 0.217 | 0.103 | 1.242 (1.015 to 1.522) | 0.035 |
| MMSE score | -0.009 | 0.007 | 0.991 (0.976 to 1.005) | 0.200 |
| BADL score | -0.003 | 0.024 | 0.997 (0.950 to 1.046) | 0.910 |
| MCCs |  |  |  |  |
| No | Reference |  |  |  |
| Yes | 0.185 | 0.089 | 1.203 (1.010 to 1.433) | 0.038 |

*Category 1: staff of farming/forestry/animal husbandry/side-line production/fishery; Category 2: workers/teachers/doctors/military/government workers/businessmen; Category 3: others

**Supplementary Table 9** The association between SWB and the risk of CVD among Chinese older adults ever or currently drinking suggested by multivariable modified Poisson regressions

| Variables | Coefficient | S.E | RR (95%CI) | P-value |
| --- | --- | --- | --- | --- |
| SWB (per 1-SD) | -0.077 | 0.064 | 0.926 (0.818 to 1.049) | 0.228 |
| Age | 0 | 0.007 | 1.000 (0.986 to 1.015) | 0.962 |
| Sex |  |  |  |  |
| Male | Reference |  |  |  |
| Female | 0.108 | 0.146 | 1.114 (0.836 to 1.483) | 0.461 |
| Nation |  |  |  |  |
| Han | Reference |  |  |  |
| Minority | -0.125 | 0.248 | 0.882 (0.542 to 1.436) | 0.615 |
| Residence |  |  |  |  |
| Rural | Reference |  |  |  |
| Urban | 0.184 | 0.118 | 1.202 (0.953 to 1.516) | 0.12 |
| Marital status |  |  |  |  |
| Married | Reference |  |  |  |
| Others | 0.028 | 0.130 | 1.028 (0.797 to 1.327) | 0.829 |
| Education |  |  |  |  |
| 0 years | Reference |  |  |  |
| 1-6 years | -0.201 | 0.127 | 0.818 (0.638 to 1.048) | 0.113 |
| ≥ 7 years | -0.513 | 0.194 | 0.599 (0.409 to 0.875) | 0.008 |
| *Occupation |  |  |  |  |
| Category 1 | Reference |  |  |  |
| Category 2 | 0.434 | 0.165 | 1.543 (1.117 to 2.134) | 0.009 |
| Category 3 | 0.186 | 0.186 | 1.204 (0.835 to 1.735) | 0.319 |
| Pension |  |  |  |  |
| No | Reference |  |  |  |
| Yes | -0.074 | 0.175 | 0.929 (0.659 to 1.309) | 0.673 |
| Mildew odor at home |  |  |  |  |
| Yes | Reference |  |  |  |
| No | 0.031 | 0.14 | 1.031 (0.784 to 1.357) | 0.823 |
| Cooking fuels |  |  |  |  |
| Clean fuels | Reference |  |  |  |
| Solid fuels | 0.024 | 0.124 | 1.024 (0.804 to 1.306) | 0.844 |
| Other fuels | 0.214 | 0.193 | 1.239 (0.850 to 1.808) | 0.266 |
| BMI | 0.046 | 0.012 | 1.047 (1.023 to 1.071) | <0.001 |
| Smoking status |  |  |  |  |
| Never | Reference |  |  |  |
| Ever | 0.482 | 0.136 | 1.619 (1.240 to 2.113) | <0.001 |
| Currently | 0.282 | 0.145 | 1.326 (0.997 to 1.763) | 0.052 |
| Duration of sleep |  |  |  |  |
| 6-8 hours | Reference |  |  |  |
| < 6 hours | 0.126 | 0.152 | 1.134 (0.841 to 1.528) | 0.410 |
| > 8 hours | -0.125 | 0.124 | 0.882 (0.692 to 1.125) | 0.315 |
| Activities score | -0.018 | 0.011 | 0.982 (0.962 to 1.003) | 0.096 |
| Regular exercise |  |  |  |  |
| Never | Reference |  |  |  |
| Ever | -0.202 | 0.182 | 0.817 (0.572 to 1.168) | 0.268 |
| Currently | 0.049 | 0.124 | 1.050 (0.823 to 1.34) | 0.694 |
| DD score | 0.006 | 0.029 | 1.006 (0.949 to 1.066) | 0.838 |
| Adequate medical care |  |  |  |  |
| Yes | Reference |  |  |  |
| No | -0.107 | 0.288 | 0.899 (0.511 to 1.579) | 0.710 |
| Regular physical examination |  |  |  |  |
| Yes | Reference |  |  |  |
| No | -0.149 | 0.108 | 0.862 (0.696 to 1.065) | 0.168 |
| Hearing impairment |  |  |  |  |
| Yes | Reference |  |  |  |
| No | 0.020 | 0.121 | 1.020 (0.806 to 1.292) | 0.869 |
| Visual impairment |  |  |  |  |
| No | Reference |  |  |  |
| Yes | -0.103 | 0.163 | 0.902 (0.656 to 1.241) | 0.527 |
| Teeth loss |  |  |  |  |
| No | Reference |  |  |  |
| Yes | 0.084 | 0.189 | 1.088 (0.751 to 1.575) | 0.658 |
| Depressive symptoms |  |  |  |  |
| No | Reference |  |  |  |
| Yes | 0.133 | 0.137 | 1.142 (0.875 to 1.493) | 0.329 |
| MMSE score | -0.011 | 0.013 | 0.989 (0.966 to 1.014) | 0.401 |
| BADL score | 0.086 | 0.048 | 1.090 (0.992 to 1.197) | 0.074 |
| MCCs |  |  |  |  |
| No | Reference |  |  |  |
| Yes | 0.165 | 0.118 | 1.179 (0.935 to 1.486) | 0.164 |

*Category 1: staff of farming/forestry/animal husbandry/side-line production/fishery; Category 2: workers/teachers/doctors/military/government workers/businessmen; Category 3: others

**Supplementary Table 10** The association between SWB and the risk of CVD among Chinese older adults never or ever do physical exercise suggested by multivariable modified Poisson regressions

| Variables | Coefficient | S.E | RR (95%CI) | P-value |
| --- | --- | --- | --- | --- |
| SWB (per 1-SD) | -0.123 | 0.047 | 0.884 (0.807 to 0.969) | 0.009 |
| Age | -0.008 | 0.005 | 0.992 (0.981 to 1.002) | 0.133 |
| Sex |  |  |  |  |
| Male | Reference |  |  |  |
| Female | -0.089 | 0.109 | 0.915 (0.738 to 1.133) | 0.413 |
| Nation |  |  |  |  |
| Han | Reference |  |  |  |
| Minority | -0.415 | 0.215 | 0.660 (0.433 to 1.007) | 0.054 |
| Residence |  |  |  |  |
| Rural | Reference |  |  |  |
| Urban | 0.048 | 0.090 | 1.049(0.880 to 1.251) | 0.593 |
| Marital status |  |  |  |  |
| Married | Reference |  |  |  |
| Others | 0.042 | 0.102 | 1.043 (0.855 to 1.274) | 0.678 |
| Education |  |  |  |  |
| 0 years | Reference |  |  |  |
| 1-6 years | -0.051 | 0.108 | 0.950 (0.770 to 1.175) | 0.638 |
| ≥ 7 years | -0.197 | 0.167 | 0.821 (0.592 to 1.139) | 0.238 |
| *Occupation |  |  |  |  |
| Category 1 | Reference |  |  |  |
| Category 2 | 0.324 | 0.129 | 1.383 (1.074 to 1.782) | 0.012 |
| Category 3 | 0.213 | 0.127 | 1.237 (0.966 to 1.586) | 0.092 |
| Pension |  |  |  |  |
| No | Reference |  |  |  |
| Yes | 0.238 | 0.148 | 1.269 (0.948 to 1.696) | 0.109 |
| Mildew odor at home |  |  |  |  |
| Yes | Reference |  |  |  |
| No | 0.044 | 0.108 | 1.045 (0.846 to 1.290) | 0.684 |
| Cooking fuels |  |  |  |  |
| Clean fuels | Reference |  |  |  |
| Solid fuels | -0.016 | 0.094 | 0.984 (0.818 to 1.183) | 0.863 |
| Other fuels | 0.176 | 0.146 | 1.192 (0.897 to 1.587) | 0.226 |
| BMI | 0.026 | 0.009 | 1.026 (1.008 to 1.046) | 0.004 |
| Smoking status |  |  |  |  |
| Never | Reference |  |  |  |
| Ever | 0.274 | 0.122 | 1.315 (1.036 to 1.669) | 0.025 |
| Currently | 0.042 | 0.124 | 1.043 (0.819 to 1.328) | 0.734 |
| Drinking status |  |  |  |  |
| Never | Reference |  |  |  |
| Ever | 0.137 | 0.122 | 1.147 (0.902 to 1.458) | 0.262 |
| Currently | -0.094 | 0.123 | 0.910 (0.716 to 1.157) | 0.442 |
| Duration of sleep |  |  |  |  |
| 6-8 hours | Reference |  |  |  |
| < 6 hours | 0.060 | 0.113 | 1.062(0.850 to 1.326) | 0.595 |
| > 8 hours | -0.087 | 0.096 | 0.917 (0.760 to 1.106) | 0.364 |
| Activities score | -0.008 | 0.009 | 0.992 (0.975 to 1.009) | 0.375 |
| DD score | -0.014 | 0.022 | 0.986 (0.944 to 1.029) | 0.522 |
| Adequate medical care |  |  |  |  |
| Yes | Reference |  |  |  |
| No | -0.395 | 0.212 | 0.674 (0.444 to 1.021) | 0.063 |
| Regular physical examination |  |  |  |  |
| Yes | Reference |  |  |  |
| No | -0.198 | 0.088 | 0.820 (0.691 to 0.975) | 0.024 |
| Hearing impairment |  |  |  |  |
| Yes | Reference |  |  |  |
| No | 0.096 | 0.096 | 1.101 (0.911 to 1.33) | 0.318 |
| Visual impairment |  |  |  |  |
| No | Reference |  |  |  |
| Yes | -0.2 | 0.111 | 0.819 (0.659 to 1.016) | 0.070 |
| Teeth loss |  |  |  |  |
| No | Reference |  |  |  |
| Yes | 0.073 | 0.163 | 1.076 (0.782 to 1.48) | 0.653 |
| Depressive symptoms |  |  |  |  |
| No | Reference |  |  |  |
| Yes | 0.055 | 0.107 | 1.057 (0.857 to 1.303) | 0.605 |
| MMSE score | -0.017 | 0.007 | 0.983 (0.969 to 0.998) | 0.021 |
| BADL score | 0.021 | 0.024 | 1.021 (0.975 to 1.070) | 0.371 |
| MCCs |  |  |  |  |
| No | Reference |  |  |  |
| Yes | 0.156 | 0.093 | 1.169 (0.975 to 1.402) | 0.092 |

*Category 1: staff of farming/forestry/animal husbandry/side-line production/fishery; Category 2: workers/teachers/doctors/military/government workers/businessmen; Category 3: others

**Supplementary Table 11** The association between SWB and the risk of CVD among Chinese older adults currently do physical exercise suggested by multivariable modified Poisson regressions

| Variables | Coefficient | S.E | RR (95%CI) | P-value |
| --- | --- | --- | --- | --- |
| SWB (per 1-SD) | -0.160 | 0.053 | 0.852 (0.769 to 0.945) | 0.002 |
| Age | -0.011 | 0.006 | 0.989 (0.978 to 1.001) | 0.075 |
| Sex |  |  |  |  |
| Male | Reference |  |  |  |
| Female | -0.131 | 0.126 | 0.877 (0.685 to 1.122) | 0.297 |
| Nation |  |  |  |  |
| Han | Reference |  |  |  |
| Minority | -0.396 | 0.232 | 0.673 (0.427 to 1.061) | 0.088 |
| Residence |  |  |  |  |
| Rural | Reference |  |  |  |
| Urban | -0.005 | 0.102 | 0.995 (0.814 to 1.215) | 0.96 |
| Marital status |  |  |  |  |
| Married | Reference |  |  |  |
| Others | 0.095 | 0.115 | 1.100 (0.877 to 1.379) | 0.409 |
| Education |  |  |  |  |
| 0 years | Reference |  |  |  |
| 1-6 years | -0.071 | 0.125 | 0.931 (0.729 to 1.191) | 0.573 |
| ≥ 7 years | -0.200 | 0.200 | 0.819 (0.553 to 1.212) | 0.318 |
| *Occupation |  |  |  |  |
| Category 1 | Reference |  |  |  |
| Category 2 | 0.329 | 0.146 | 1.390 (1.044 to 1.850) | 0.024 |
| Category 3 | 0.218 | 0.150 | 1.244 (0.928 to 1.667) | 0.145 |
| Pension |  |  |  |  |
| No | Reference |  |  |  |
| Yes | 0.239 | 0.182 | 1.270 (0.889 to 1.813) | 0.189 |
| Mildew odor at home |  |  |  |  |
| Yes | Reference |  |  |  |
| No | -0.028 | 0.119 | 0.972 (0.770 to 1.228) | 0.812 |
| Cooking fuels |  |  |  |  |
| Clean fuels | Reference |  |  |  |
| Solid fuels | 0.047 | 0.107 | 1.048 (0.850 to 1.292) | 0.66 |
| Other fuels | 0.236 | 0.161 | 1.266 (0.923 to 1.735) | 0.144 |
| BMI | 0.028 | 0.011 | 1.028 (1.007 to 1.050) | 0.008 |
| Smoking status |  |  |  |  |
| Never | Reference |  |  |  |
| Ever | 0.227 | 0.14 | 1.255 (0.954 to 1.65) | 0.104 |
| Currently | 0.041 | 0.141 | 1.042 (0.790 to 1.374) | 0.771 |
| Drinking status |  |  |  |  |
| Never | Reference |  |  |  |
| Ever | 0.320 | 0.138 | 1.377 (1.050 to 1.806) | 0.021 |
| Currently | -0.004 | 0.135 | 0.996 (0.764 to 1.300) | 0.978 |
| Duration of sleep |  |  |  |  |
| 6-8 hours | Reference |  |  |  |
| < 6 hours | 0.119 | 0.127 | 1.126 (0.878 to 1.445) | 0.348 |
| > 8 hours | -0.05 | 0.109 | 0.951 (0.768 to 1.177) | 0.644 |
| Activities score | -0.016 | 0.010 | 0.984 (0.965 to 1.004) | 0.121 |
| DD score | 0.005 | 0.025 | 1.005 (0.957 to 1.055) | 0.84 |
| Adequate medical care |  |  |  |  |
| Yes | Reference |  |  |  |
| No | -0.407 | 0.237 | 0.666 (0.418 to 1.06) | 0.086 |
| Regular physical examination |  |  |  |  |
| Yes | Reference |  |  |  |
| No | -0.252 | 0.100 | 0.777 (0.639 to 0.946) | 0.012 |
| Hearing impairment |  |  |  |  |
| Yes | Reference |  |  |  |
| No | 0.151 | 0.109 | 1.163 (0.940 to 1.439) | 0.164 |
| Visual impairment |  |  |  |  |
| No | Reference |  |  |  |
| Yes | -0.184 | 0.126 | 0.832 (0.650 to 1.066) | 0.146 |
| Teeth loss |  |  |  |  |
| No | Reference |  |  |  |
| Yes | 0.092 | 0.184 | 1.096 (0.765 to 1.573) | 0.616 |
| Depressive symptoms |  |  |  |  |
| No | Reference |  |  |  |
| Yes | 0.079 | 0.119 | 1.082 (0.856 to 1.368) | 0.51 |
| MMSE score | -0.020 | 0.008 | 0.980 (0.965 to 0.996) | 0.012 |
| BADL score | 0.053 | 0.031 | 1.054 (0.993 to 1.121) | 0.086 |
| MCCs |  |  |  |  |
| No | Reference |  |  |  |
| Yes | 0.006 | 0.112 | 1.006 (0.808 to 1.254) | 0.955 |

*Category 1: staff of farming/forestry/animal husbandry/side-line production/fishery; Category 2: workers/teachers/doctors/military/government workers/businessmen; Category 3: others

**Supplementary Table 12** The association between SWB and the risk of CVD among Chinese older adults with healthy sleep suggested by multivariable modified Poisson regressions

| Variables | Coefficient | S.E | RR (95%CI) | P-value |
| --- | --- | --- | --- | --- |
| SWB (per 1-SD) | -0.140 | 0.050 | 0.869 (0.787 to 0.960) | 0.005 |
| Age | -0.005 | 0.006 | 0.995 (0.984 to 1.006) | 0.401 |
| Sex |  |  |  |  |
| Male | Reference |  |  |  |
| Female | 0.069 | 0.116 | 1.071 (0.854 to 1.346) | 0.550 |
| Nation |  |  |  |  |
| Han | Reference |  |  |  |
| Minority | -0.278 | 0.221 | 0.757 (0.491 to 1.168) | 0.208 |
| Residence |  |  |  |  |
| Rural | Reference |  |  |  |
| Urban | 0.092 | 0.098 | 1.096 (0.904 to 1.328) | 0.351 |
| Marital status |  |  |  |  |
| Married | Reference |  |  |  |
| Others | 0.007 | 0.103 | 1.007 (0.823 to 1.234) | 0.943 |
| Education |  |  |  |  |
| 0 years | Reference |  |  |  |
| 1-6 years | 0.060 | 0.111 | 1.062 (0.854 to 1.319) | 0.59 |
| ≥ 7 years | -0.041 | 0.164 | 0.960 (0.696 to 1.324) | 0.802 |
| *Occupation |  |  |  |  |
| Category 1 | Reference |  |  |  |
| Category 2 | 0.341 | 0.135 | 1.406 (1.079 to 1.833) | 0.012 |
| Category 3 | 0.083 | 0.146 | 1.087 (0.815-1.448) | 0.57 |
| Pension |  |  |  |  |
| No | Reference |  |  |  |
| Yes | -0.014 | 0.150 | 0.986 (0.735 to 1.324) | 0.927 |
| Mildew odor at home |  |  |  |  |
| Yes | Reference |  |  |  |
| No | 0.069 | 0.119 | 1.071 (0.849 to 1.351) | 0.563 |
| Cooking fuels |  |  |  |  |
| Clean fuels | Reference |  |  |  |
| Solid fuels | -0.056 | 0.103 | 0.946 (0.773 to 1.157) | 0.588 |
| Other fuels | 0.050 | 0.168 | 1.051 (0.756 to 1.462) | 0.766 |
| BMI | 0.028 | 0.009 | 1.028 (1.011 to 1.046) | 0.001 |
| Smoking status |  |  |  |  |
| Never | Reference |  |  |  |
| Ever | 0.312 | 0.120 | 1.366 (1.079 to 1.728) | 0.010 |
| Currently | 0.083 | 0.125 | 1.087 (0.850 to 1.388) | 0.506 |
| Drinking status |  |  |  |  |
| Never | Reference |  |  |  |
| Ever | 0.126 | 0.123 | 1.134 (0.891 to 1.443) | 0.305 |
| Currently | -0.042 | 0.124 | 0.959 (0.751 to 1.223) | 0.733 |
| Activities score | -0.02 | 0.009 | 0.980 (0.962 to 0.998) | 0.028 |
| Regular exercise |  |  |  |  |
| Never | Reference |  |  |  |
| Ever | 0.288 | 0.135 | 1.334 (1.024 to 1.738) | 0.033 |
| Currently | 0.158 | 0.107 | 1.171 (0.949 to 1.443) | 0.140 |
| DD score | -0.015 | 0.024 | 0.985 (0.941 to 1.031) | 0.524 |
| Adequate medical care |  |  |  |  |
| Yes | Reference |  |  |  |
| No | -0.344 | 0.260 | 0.709 (0.426 to 1.179) | 0.186 |
| Regular physical examination |  |  |  |  |
| Yes | Reference |  |  |  |
| No | -0.115 | 0.092 | 0.891 (0.744 to 1.068) | 0.214 |
| Hearing impairment |  |  |  |  |
| Yes | Reference |  |  |  |
| No | 0.280 | 0.103 | 1.323 (1.081 to 1.619) | 0.007 |
| Visual impairment |  |  |  |  |
| No | Reference |  |  |  |
| Yes | -0.185 | 0.131 | 0.831 (0.643 to 1.076) | 0.159 |
| Teeth loss |  |  |  |  |
| No | Reference |  |  |  |
| Yes | 0.097 | 0.154 | 1.102 (0.815 to 1.489) | 0.529 |
| Depressive symptoms |  |  |  |  |
| No | Reference |  |  |  |
| Yes | 0.161 | 0.119 | 1.175 (0.931 to 1.483) | 0.176 |
| MMSE score | -0.014 | 0.009 | 0.986 (0.969 to 1.004) | 0.118 |
| BADL score | -0.017 | 0.028 | 0.983 (0.931 to 1.039) | 0.546 |
| MCCs |  |  |  |  |
| No | Reference |  |  |  |
| Yes | 0.180 | 0.097 | 1.197 (0.989 to 1.448) | 0.065 |

*Category 1: staff of farming/forestry/animal husbandry/side-line production/fishery; Category 2: workers/teachers/doctors/military/government workers/businessmen; Category 3: others

**Supplementary Table 13** The association between SWB and the risk of CVD among Chinese older adults with unhealthy sleep suggested by multivariable modified Poisson regressions

| Variables | Coefficient | S.E | RR (95%CI) | P-value |
| --- | --- | --- | --- | --- |
| SWB (per 1-SD) | -0.082 | 0.054 | 0.921 (0.828 to 1.024) | 0.131 |
| Age | -0.008 | 0.007 | 0.992 (0.979 to 1.005) | 0.243 |
| Sex |  |  |  |  |
| Male | Reference |  |  |  |
| Female | -0.12 | 0.130 | 0.887 (0.687 to 1.145) | 0.357 |
| Nation |  |  |  |  |
| Han | Reference |  |  |  |
| Minority | -0.486 | 0.249 | 0.615 (0.378 to 1.002) | 0.051 |
| Residence |  |  |  |  |
| Rural | Reference |  |  |  |
| Urban | -0.046 | 0.103 | 0.955 (0.780 to 1.170) | 0.657 |
| Marital status |  |  |  |  |
| Married | Reference |  |  |  |
| Others | 0.005 | 0.122 | 1.005 (0.791 to 1.275) | 0.970 |
| Education |  |  |  |  |
| 0 years | Reference |  |  |  |
| 1-6 years | -0.063 | 0.125 | 0.939 (0.735 to 1.198) | 0.610 |
| ≥ 7 years | -0.130 | 0.183 | 0.878 (0.613 to 1.257) | 0.479 |
| *Occupation |  |  |  |  |
| Category 1 | Reference |  |  |  |
| Category 2 | 0.218 | 0.164 | 1.244 (0.902 to 1.714) | 0.183 |
| Category 3 | 0.191 | 0.152 | 1.210 (0.899 to 1.631) | 0.209 |
| Pension |  |  |  |  |
| No | Reference |  |  |  |
| Yes | 0.272 | 0.164 | 1.313 (0.952 to 1.808) | 0.097 |
| Mildew odor at home |  |  |  |  |
| Yes | Reference |  |  |  |
| No | -0.004 | 0.120 | 0.996 (0.787-1.260) | 0.976 |
| Cooking fuels |  |  |  |  |
| Clean fuels | Reference |  |  |  |
| Solid fuels | -0.056 | 0.111 | 0.946 (0.760 to 1.176) | 0.613 |
| Other fuels | 0.236 | 0.168 | 1.266 (0.912 to 1.759) | 0.159 |
| BMI | 0.032 | 0.011 | 1.033 (1.011 to 1.054) | 0.003 |
| Smoking status |  |  |  |  |
| Never | Reference |  |  |  |
| Ever | 0.192 | 0.140 | 1.212 (0.921 to 1.595) | 0.169 |
| Currently | -0.051 | 0.147 | 0.950 (0.712 to 1.269) | 0.729 |
| Drinking status |  |  |  |  |
| Never | Reference |  |  |  |
| Ever | 0.131 | 0.134 | 1.140 (0.876 to 1.481) | 0.329 |
| Currently | -0.114 | 0.143 | 0.892(0.675-1.181) | 0.425 |
| Activities score | 0 | 0.010 | 1.000 (0.980 to 1.020) | 0.985 |
| Regular exercise |  |  |  |  |
| Never | Reference |  |  |  |
| Ever | 0.158 | 0.145 | 1.171 (0.882 to 1.556) | 0.274 |
| Currently | 0.012 | 0.114 | 1.012 (0.810 to 1.265) | 0.917 |
| DD score | -0.027 | 0.027 | 0.973 (0.923 to 1.026) | 0.326 |
| Adequate medical care |  |  |  |  |
| Yes | Reference |  |  |  |
| No | -0.574 | 0.270 | 0.563 (0.332 to 0.956) | 0.034 |
| Regular physical examination |  |  |  |  |
| Yes | Reference |  |  |  |
| No | -0.076 | 0.104 | 0.927 (0.755 to 1.138) | 0.466 |
| Hearing impairment |  |  |  |  |
| Yes | Reference |  |  |  |
| No | -0.200 | 0.107 | 0.819 (0.664 to 1.011) | 0.063 |
| Visual impairment |  |  |  |  |
| No | Reference |  |  |  |
| Yes | -0.044 | 0.128 | 0.957 (0.745 to 1.23) | 0.731 |
| Teeth loss |  |  |  |  |
| No | Reference |  |  |  |
| Yes | 0.055 | 0.204 | 1.057 (0.708 to 1.576) | 0.787 |
| Depressive symptoms |  |  |  |  |
| No | Reference |  |  |  |
| Yes | 0.208 | 0.115 | 1.231 (0.983 to 1.542) | 0.070 |
| MMSE score | -0.005 | 0.009 | 0.995 (0.978 to 1.013) | 0.608 |
| BADL score | 0.055 | 0.033 | 1.057 (0.991 to 1.126) | 0.093 |
| MCCs |  |  |  |  |
| No | Reference |  |  |  |
| Yes | 0.186 | 0.105 | 1.204 (0.981 to 1.478) | 0.075 |

*Category 1: staff of farming/forestry/animal husbandry/side-line production/fishery; Category 2: workers/teachers/doctors/military/government workers/businessmen; Category 3: others

**Supplementary Table 14** The association between SWB and the risk of CVD among Chinese older adults with healthy diet suggested by multivariable modified Poisson regressions

| Variables | Coefficient | S.E | RR (95%CI) | P-value |
| --- | --- | --- | --- | --- |
| SWB (per 1-SD) | -0.089 | 0.051 | 0.915 (0.828 to 1.011) | 0.08 |
| Age | -0.007 | 0.006 | 0.993 (0.981 to 1.005) | 0.238 |
| Sex |  |  |  |  |
| Male | Reference |  |  |  |
| Female | 0.015 | 0.125 | 1.015 (0.795 to 1.297) | 0.904 |
| Nation |  |  |  |  |
| Han | Reference |  |  |  |
| Minority | -0.696 | 0.33 | 0.499 (0.261 to 0.952) | 0.035 |
| Residence |  |  |  |  |
| Rural | Reference |  |  |  |
| Urban | 0.154 | 0.103 | 1.166 (0.952 to 1.428) | 0.137 |
| Marital status |  |  |  |  |
| Married | Reference |  |  |  |
| Others | 0.133 | 0.112 | 1.142 (0.918 to 1.423) | 0.234 |
| Education |  |  |  |  |
| 0 years | Reference |  |  |  |
| 1-6 years | 0.060 | 0.124 | 1.062 (0.834 to 1.353) | 0.628 |
| ≥ 7 years | -0.056 | 0.162 | 0.946 (0.687 to 1.300) | 0.730 |
| *Occupation |  |  |  |  |
| Category 1 | Reference |  |  |  |
| Category 2 | 0.214 | 0.137 | 1.239 (0.947 to 1.619) | 0.117 |
| Category 3 | 0.166 | 0.147 | 1.181 (0.885 to 1.575) | 0.258 |
| Pension |  |  |  |  |
| No | Reference |  |  |  |
| Yes | 0.202 | 0.136 | 1.224 (0.939 to 1.597) | 0.135 |
| Mildew odor at home |  |  |  |  |
| Yes | Reference |  |  |  |
| No | 0.149 | 0.147 | 1.161 (0.871 to 1.547) | 0.309 |
| Cooking fuels |  |  |  |  |
| Clean fuels | Reference |  |  |  |
| Solid fuels | -0.070 | 0.110 | 0.932 (0.752 to 1.157) | 0.526 |
| Other fuels | 0.108 | 0.183 | 1.114 (0.779 to 1.594) | 0.554 |
| BMI | 0.024 | 0.010 | 1.024 (1.003 to 1.045) | 0.023 |
| Smoking status |  |  |  |  |
| Never | Reference |  |  |  |
| Ever | 0.519 | 0.118 | 1.680 (1.335 to 2.117) | <0.001 |
| Currently | 0.224 | 0.129 | 1.251 (0.971 to 1.611) | 0.083 |
| Drinking status |  |  |  |  |
| Never | Reference |  |  |  |
| Ever | 0.088 | 0.123 | 1.092 (0.858 to 1.390) | 0.475 |
| Currently | 0.068 | 0.122 | 1.070 (0.843 to 1.361) | 0.575 |
| Duration of sleep |  |  |  |  |
| 6-8 hours | Reference |  |  |  |
| < 6 hours | 0.123 | 0.134 | 1.131 (0.869 to 1.473) | 0.358 |
| > 8 hours | -0.087 | 0.108 | 0.917 (0.742 to 1.132) | 0.42 |
| Activities score | -0.015 | 0.010 | 0.985 (0.968 to 1.004) | 0.127 |
| Regular exercise |  |  |  |  |
| Never | Reference |  |  |  |
| Ever | 0.145 | 0.140 | 1.156 (0.877 to 1.522) | 0.303 |
| Currently | 0.083 | 0.112 | 1.087 (0.872 to 1.354) | 0.461 |
| Adequate medical care |  |  |  |  |
| Yes | Reference |  |  |  |
| No | -0.704 | 0.398 | 0.495 (0.227 to 1.079) | 0.077 |
| Regular physical examination |  |  |  |  |
| Yes | Reference |  |  |  |
| No | -0.066 | 0.095 | 0.936 (0.777 to 1.127) | 0.487 |
| Hearing impairment |  |  |  |  |
| Yes | Reference |  |  |  |
| No | 0.166 | 0.110 | 1.181 (0.951 to 1.464) | 0.131 |
| Visual impairment |  |  |  |  |
| No | Reference |  |  |  |
| Yes | -0.093 | 0.136 | 0.911 (0.698 to 1.189) | 0.493 |
| Teeth loss |  |  |  |  |
| No | Reference |  |  |  |
| Yes | 0.092 | 0.157 | 1.096 (0.806 to 1.493) | 0.557 |
| Depressive symptoms |  |  |  |  |
| No | Reference |  |  |  |
| Yes | 0.197 | 0.124 | 1.218 (0.954 to 1.554) | 0.113 |
| MMSE score | -0.011 | 0.010 | 0.989 (0.969 to 1.009) | 0.266 |
| BADL score | -0.019 | 0.030 | 0.981 (0.925 to 1.040) | 0.518 |
| MCCs |  |  |  |  |
| No | Reference |  |  |  |
| Yes | 0.179 | 0.102 | 1.196 (0.979 to 1.459) | 0.079 |

*Category 1: staff of farming/forestry/animal husbandry/side-line production/fishery; Category 2: workers/teachers/doctors/military/government workers/businessmen; Category 3: others

**Supplementary Table 15** The association between SWB and the risk of CVD among Chinese older adults with unhealthy diet suggested by multivariable modified Poisson regressions

| Variables | Coefficient | S.E | RR (95%CI) | P-value |
| --- | --- | --- | --- | --- |
| SWB (per 1-SD) | -0.129 | 0.052 | 0.879 (0.794 to 0.973) | 0.013 |
| Age | -0.004 | 0.006 | 0.996 (0.984 to 1.008) | 0.553 |
| Sex |  |  |  |  |
| Male | Reference |  |  |  |
| Female | -0.089 | 0.120 | 0.915 (0.724 to 1.156) | 0.457 |
| Nation |  |  |  |  |
| Han | Reference |  |  |  |
| Minority | -0.258 | 0.191 | 0.773 (0.532 to 1.124) | 0.177 |
| Residence |  |  |  |  |
| Rural | Reference |  |  |  |
| Urban | -0.075 | 0.101 | 0.928 (0.761 to 1.131) | 0.460 |
| Marital status |  |  |  |  |
| Married | Reference |  |  |  |
| Others | -0.097 | 0.109 | 0.908 (0.733 to 1.125) | 0.378 |
| Education |  |  |  |  |
| 0 years | Reference |  |  |  |
| 1-6 years | -0.002 | 0.114 | 0.998 (0.798 to 1.249) | 0.984 |
| ≥ 7 years | -0.109 | 0.199 | 0.897 (0.607 to 1.324) | 0.583 |
| *Occupation |  |  |  |  |
| Category 1 | Reference |  |  |  |
| Category 2 | 0.265 | 0.165 | 1.303 (0.945 to 1.800) | 0.107 |
| Category 3 | 0.109 | 0.153 | 1.115 (0.827 to 1.505) | 0.474 |
| Pension |  |  |  |  |
| No | Reference |  |  |  |
| Yes | 0.013 | 0.198 | 1.013 (0.687 to 1.496) | 0.946 |
| Mildew odor at home |  |  |  |  |
| Yes | Reference |  |  |  |
| No | -0.046 | 0.104 | 0.955 (0.780 to 1.170) | 0.657 |
| Cooking fuels |  |  |  |  |
| Clean fuels | Reference |  |  |  |
| Solid fuels | -0.031 | 0.106 | 0.969 (0.787 to 1.192) | 0.767 |
| Other fuels | 0.208 | 0.161 | 1.231 (0.898 to 1.687) | 0.197 |
| BMI | 0.036 | 0.008 | 1.037 (1.020 to 1.053) | <0.001 |
| Smoking status |  |  |  |  |
| Never | Reference |  |  |  |
| Ever | -0.066 | 0.143 | 0.936 (0.707 to 1.240) | 0.646 |
| Currently | -0.163 | 0.142 | 0.850 (0.643 to 1.122) | 0.252 |
| Drinking status |  |  |  |  |
| Never | Reference |  |  |  |
| Ever | 0.247 | 0.131 | 1.280 (0.990 to 1.655) | 0.059 |
| Currently | -0.275 | 0.149 | 0.760 (0.567 to 1.018) | 0.066 |
| Duration of sleep |  |  |  |  |
| 6-8 hours | Reference |  |  |  |
| < 6 hours | -0.022 | 0.121 | 0.978 (0.771 to 1.241) | 0.857 |
| > 8 hours | -0.086 | 0.107 | 0.918 (0.745 to 1.131) | 0.419 |
| Activities score | -0.006 | 0.010 | 0.994 (0.975 to 1.013) | 0.526 |
| Regular exercise |  |  |  |  |
| Never | Reference |  |  |  |
| Ever | 0.291 | 0.139 | 1.338 (1.019 to 1.756) | 0.036 |
| Currently | 0.084 | 0.109 | 1.088 (0.878 to 1.347) | 0.440 |
| Adequate medical care |  |  |  |  |
| Yes | Reference |  |  |  |
| No | -0.431 | 0.216 | 0.650 (0.425 to 0.992) | 0.046 |
| Regular physical examination |  |  |  |  |
| Yes | Reference |  |  |  |
| No | -0.123 | 0.101 | 0.884 (0.725 to 1.078) | 0.222 |
| Hearing impairment |  |  |  |  |
| Yes | Reference |  |  |  |
| No | -0.085 | 0.099 | 0.919 (0.756 to 1.116) | 0.392 |
| Visual impairment |  |  |  |  |
| No | Reference |  |  |  |
| Yes | -0.171 | 0.124 | 0.843 (0.661 to 1.076) | 0.169 |
| Teeth loss |  |  |  |  |
| No | Reference |  |  |  |
| Yes | 0.056 | 0.197 | 1.058 (0.719 to 1.556) | 0.775 |
| Depressive symptoms |  |  |  |  |
| No | Reference |  |  |  |
| Yes | 0.179 | 0.110 | 1.196 (0.965 to 1.483) | 0.103 |
| MMSE score | -0.005 | 0.008 | 0.995 (0.979 to 1.011) | 0.543 |
| BADL score | 0.054 | 0.033 | 1.055 (0.988 to 1.126) | 0.107 |
| MCCs |  |  |  |  |
| No | Reference |  |  |  |
| Yes | 0.158 | 0.099 | 1.171 (0.964 to 1.423) | 0.112 |

*Category 1: staff of farming/forestry/animal husbandry/side-line production/fishery; Category 2: workers/teachers/doctors/military/government workers/businessmen; Category 3: others

**Supplementary Table 16** The association between SWB and the risk of CVD among Chinese older adults with 0-2 healthy lifestyles suggested by multivariable modified Poisson regressions

| Variables | Coefficient | S.E | RR (95%CI) | P-value |
| --- | --- | --- | --- | --- |
| SWB (per 1-SD) | -0.061 | 0.067 | 0.941 (0.824 to 1.074) | 0.365 |
| Age | -0.006 | 0.008 | 0.994 (0.978 to 1.010) | 0.439 |
| Sex |  |  |  |  |
| Male | Reference |  |  |  |
| Female | -0.089 | 0.156 | 0.915 (0.674 to 1.241) | 0.568 |
| Nation |  |  |  |  |
| Han | Reference |  |  |  |
| Minority | -0.311 | 0.296 | 0.733 (0.410 to 1.310) | 0.294 |
| Residence |  |  |  |  |
| Rural | Reference |  |  |  |
| Urban | -0.026 | 0.130 | 0.974 (0.754 to 1.257) | 0.841 |
| Marital status |  |  |  |  |
| Married | Reference |  |  |  |
| Others | 0.029 | 0.154 | 1.029 (0.761 to 1.392) | 0.853 |
| Education |  |  |  |  |
| 0 year | Reference |  |  |  |
| 1-6 years | -0.084 | 0.155 | 0.919 (0.679 to 1.245) | 0.588 |
| ≥ 7 years | -0.433 | 0.234 | 0.649 (0.410 to 1.026) | 0.064 |
| *Occupation |  |  |  |  |
| Category 1 | Reference |  |  |  |
| Category 2 | 0.464 | 0.183 | 1.590 (1.111 to 2.277) | 0.011 |
| Category 3 | 0.42 | 0.193 | 1.522 (1.043 to 2.223) | 0.029 |
| Pension |  |  |  |  |
| No | Reference |  |  |  |
| Yes | 0.097 | 0.206 | 1.102 (0.736 to 1.649) | 0.638 |
| Mildew odor at home |  |  |  |  |
| Yes | Reference |  |  |  |
| No | -0.063 | 0.141 | 0.939 (0.713 to 1.237) | 0.655 |
| Cooking fuels |  |  |  |  |
| Clean fuels | Reference |  |  |  |
| Solid fuels | -0.064 | 0.136 | 0.938 (0.718 to 1.225) | 0.638 |
| Other fuels | 0.436 | 0.193 | 1.547 (1.060 to 2.257) | 0.024 |
| Activities score | -0.002 | 0.012 | 0.998 (0.975 to 1.020) | 0.836 |
| Adequate medical care |  |  |  |  |
| Yes | Reference |  |  |  |
| No | -0.355 | 0.291 | 0.701 (0.396 to 1.241) | 0.223 |
| Regular physical examination |  |  |  |  |
| Yes | Reference |  |  |  |
| No | -0.169 | 0.125 | 0.845 (0.660 to 1.080) | 0.178 |
| Hearing impairment |  |  |  |  |
| Yes | Reference |  |  |  |
| No | -0.064 | 0.136 | 0.938 (0.718 to 1.224) | 0.637 |
| Visual impairment |  |  |  |  |
| No | Reference |  |  |  |
| Yes | -0.025 | 0.157 | 0.975 (0.717 to 1.327) | 0.874 |
| Teeth loss |  |  |  |  |
| No | Reference |  |  |  |
| Yes | 0.110 | 0.259 | 1.116 (0.672 to 1.855) | 0.671 |
| Depressive symptoms |  |  |  |  |
| No | Reference |  |  |  |
| Yes | 0.016 | 0.152 | 1.016 (0.755 to 1.368) | 0.916 |
| MMSE score | -0.012 | 0.012 | 0.988 (0.966 to 1.011) | 0.302 |
| BADL score | 0.053 | 0.039 | 1.054 (0.976 to 1.138) | 0.177 |
| MCCs |  |  |  |  |
| No | Reference |  |  |  |
| Yes | 0.199 | 0.133 | 1.220 (0.939 to 1.584) | 0.136 |

*Category 1: staff of farming/forestry/animal husbandry/side-line production/fishery; Category 2: workers/teachers/doctors/military/government workers/businessmen; Category 3: others

**Supplementary Table 17** The association between SWB and the risk of CVD among Chinese older adults with 1-3 healthy lifestyles suggested by multivariable modified Poisson regressions

| Variables | Coefficient | S.E | RR(95%CI) | P-value |
| --- | --- | --- | --- | --- |
| SWB (per 1-SD) | -0.058 | 0.046 | 0.944 (0.862 to 1.034) | 0.210 |
| Age | -0.007 | 0.005 | 0.993 (0.982 to 1.003) | 0.177 |
| Sex |  |  |  |  |
| Male | Reference |  |  |  |
| Female | -0.111 | 0.102 | 0.895 (0.733 to 1.094) | 0.279 |
| Nation |  |  |  |  |
| Han | Reference |  |  |  |
| Minority | -0.177 | 0.184 | 0.838 (0.584 to 1.202) | 0.337 |
| Residence |  |  |  |  |
| Rural | Reference |  |  |  |
| Urban | 0.046 | 0.091 | 1.047 (0.875 to 1.251) | 0.616 |
| Marital status |  |  |  |  |
| Married | Reference |  |  |  |
| Others | -0.032 | 0.105 | 0.969 (0.789 to 1.190) | 0.764 |
| Education |  |  |  |  |
| 0 year | Reference |  |  |  |
| 1-6 years | -0.150 | 0.110 | 0.861 (0.695 to 1.067) | 0.172 |
| ≥ 7 years | -0.357 | 0.166 | 0.700 (0.505 to 0.969) | 0.032 |
| *Occupation |  |  |  |  |
| Category 1 | Reference |  |  |  |
| Category 2 | 0.32 | 0.130 | 1.377 (1.067 to 1.775) | 0.014 |
| Category 3 | 0.221 | 0.137 | 1.247 (0.954 to 1.631) | 0.106 |
| Pension |  |  |  |  |
| No | Reference |  |  |  |
| Yes | 0.209 | 0.141 | 1.232 (0.935 to 1.624) | 0.137 |
| Mildew odor at home |  |  |  |  |
| Yes | Reference |  |  |  |
| No | 0.069 | 0.106 | 1.071 (0.87 to 1.318) | 0.515 |
| Cooking fuels |  |  |  |  |
| Clean fuels | Reference |  |  |  |
| Solid fuels | -0.037 | 0.093 | 0.964 (0.803 to 1.156) | 0.690 |
| Other fuels | -0.006 | 0.167 | 0.994 (0.715 to 1.380) | 0.969 |
| Activities score | -0.01 | 0.008 | 0.990 (0.973 to 1.007) | 0.238 |
| Adequate medical care |  |  |  |  |
| Yes | Reference |  |  |  |
| No | -0.367 | 0.215 | 0.693 (0.455 to 1.055) | 0.087 |
| Regular physical examination |  |  |  |  |
| Yes | Reference |  |  |  |
| No | -0.151 | 0.090 | 0.860 (0.721 to 1.025) | 0.092 |
| Hearing impairment |  |  |  |  |
| Yes | Reference |  |  |  |
| No | -0.027 | 0.095 | 0.973 (0.807 to 1.172) | 0.774 |
| Visual impairment |  |  |  |  |
| No | Reference |  |  |  |
| Yes | -0.103 | 0.116 | 0.902 (0.718 to 1.134) | 0.378 |
| Teeth loss |  |  |  |  |
| No | Reference |  |  |  |
| Yes | 0.030 | 0.159 | 1.030 (0.755 to 1.406) | 0.850 |
| Depressive symptoms |  |  |  |  |
| No | Reference |  |  |  |
| Yes | 0.131 | 0.105 | 1.140 (0.927 to 1.402) | 0.214 |
| MMSE score | -0.001 | 0.008 | 0.999 (0.983 to 1.015) | 0.899 |
| BADL score | 0.016 | 0.027 | 1.016 (0.965 to 1.07) | 0.546 |
| MCCs |  |  |  |  |
| No | Reference |  |  |  |
| Yes | 0.193 | 0.093 | 1.213 (1.010 to 1.456) | 0.039 |

*Category 1: staff of farming/forestry/animal husbandry/side-line production/fishery; Category 2: workers/teachers/doctors/military/government workers/businessmen; Category 3: others

**Supplementary Table 18** The association between SWB and the risk of CVD among Chinese older adults with 2-4 healthy lifestyles suggested by multivariable modified Poisson regressions

| Variables | Coefficient | S.E | RR (95%CI) | P-value |
| --- | --- | --- | --- | --- |
| SWB (per 1-SD) | -0.101 | 0.040 | 0.904 (0.836 to 0.977) | 0.012 |
| Age | -0.006 | 0.005 | 0.994 (0.985 to 1.003) | 0.171 |
| Sex |  |  |  |  |
| Male |  |  |  |  |
| Female | -0.14 | 0.087 | 0.869 (0.733 to 1.030) | 0.107 |
| Nation |  |  |  |  |
| Han |  |  |  |  |
| Minority | -0.352 | 0.179 | 0.703 (0.495 to 0.999) | 0.049 |
| Residence |  |  |  |  |
| Rural |  |  |  |  |
| Urban | -0.011 | 0.077 | 0.989 (0.850 to 1.150) | 0.887 |
| Marital status |  |  |  |  |
| Married |  |  |  |  |
| Others | 0.051 | 0.089 | 1.052 (0.883 to 1.252) | 0.569 |
| Education |  |  |  |  |
| 0 year |  |  |  |  |
| 1-6 years | -0.050 | 0.094 | 0.951 (0.791 to 1.145) | 0.599 |
| ≥ 7 years | -0.157 | 0.142 | 0.855 (0.648 to 1.129) | 0.269 |
| *Occupation |  |  |  |  |
| Category 1 |  |  |  |  |
| Category 2 | 0.301 | 0.118 | 1.351 (1.073 to 1.704) | 0.011 |
| Category 3 | 0.201 | 0.112 | 1.223 (0.981 to 1.522) | 0.073 |
| Pension |  |  |  |  |
| No |  |  |  |  |
| Yes | 0.146 | 0.126 | 1.157 (0.903 to 1.481) | 0.248 |
| Mildew odor at home |  |  |  |  |
| Yes |  |  |  |  |
| No | 0.129 | 0.096 | 1.138 (0.943 to 1.373) | 0.179 |
| Cooking fuels |  |  |  |  |
| Clean fuels |  |  |  |  |
| Solid fuels | -0.100 | 0.080 | 0.905 (0.773 to 1.059) | 0.213 |
| Other fuels | 0.024 | 0.141 | 1.024 (0.776 to 1.351) | 0.865 |
| Activities score | -0.008 | 0.007 | 0.992 (0.978 to 1.007) | 0.287 |
| Adequate medical care |  |  |  |  |
| Yes |  |  |  |  |
| No | -0.422 | 0.204 | 0.656 (0.440 to 0.977) | 0.038 |
| Regular physical examination |  |  |  |  |
| Yes |  |  |  |  |
| No | -0.110 | 0.077 | 0.896 (0.771 to 1.042) | 0.153 |
| Hearing impairment |  |  |  |  |
| Yes |  |  |  |  |
| No | 0.051 | 0.081 | 1.052 (0.898 to 1.234) | 0.528 |
| Visual impairment |  |  |  |  |
| No |  |  |  |  |
| Yes | -0.167 | 0.104 | 0.846 (0.690 to 1.038) | 0.109 |
| Teeth loss |  |  |  |  |
| No |  |  |  |  |
| Yes | 0.078 | 0.142 | 1.081 (0.819 to 1.428) | 0.582 |
| Depressive symptoms |  |  |  |  |
| No |  |  |  |  |
| Yes | 0.192 | 0.091 | 1.212 (1.015 to 1.448) | 0.034 |
| MMSE score | -0.004 | 0.007 | 0.996 (0.982 to 1.009) | 0.511 |
| BADL score | 0.001 | 0.023 | 1.001 (0.957 to 1.047) | 0.973 |
| MCCs |  |  |  |  |
| No |  |  |  |  |
| Yes | 0.193 | 0.08 | 1.213 (1.038 to 1.418) | 0.015 |

*Category 1: staff of farming/forestry/animal husbandry/side-line production/fishery; Category 2: workers/teachers/doctors/military/government workers/businessmen; Category 3: others

**Supplementary Table 19** The association between SWB and the risk of CVD among Chinese older adults with 3-5 healthy lifestyles suggested by multivariable modified Poisson regressions

| Variables | Coefficient | S.E | RR(95%CI) | P-value |
| --- | --- | --- | --- | --- |
| SWB (per 1-SD) | -0.139 | 0.044 | 0.870 (0.799 to 0.948) | 0.001 |
| Age | -0.008 | 0.005 | 0.992 (0.982 to 1.002) | 0.109 |
| Sex |  |  |  |  |
| Male | Reference |  |  |  |
| Female | -0.091 | 0.091 | 0.913 (0.763 to 1.091) | 0.317 |
| Nation |  |  |  |  |
| Han | Reference |  |  |  |
| Minority | -0.423 | 0.206 | 0.655 (0.438 to 0.981) | 0.040 |
| Residence |  |  |  |  |
| Rural | Reference |  |  |  |
| Urban | 0.099 | 0.085 | 1.104 (0.935 to 1.305) | 0.244 |
| Marital status |  |  |  |  |
| Married | Reference |  |  |  |
| Others | 0.014 | 0.096 | 1.014 (0.840 to 1.223) | 0.887 |
| Education |  |  |  |  |
| 0 year | Reference |  |  |  |
| 1-6 years | 0.062 | 0.100 | 1.064 (0.875 to 1.296) | 0.535 |
| ≥ 7 years | -0.016 | 0.151 | 0.984 (0.731 to 1.323) | 0.914 |
| *Occupation |  |  |  |  |
| Category 1 | Reference |  |  |  |
| Category 2 | 0.177 | 0.127 | 1.194 (0.930 to 1.533) | 0.164 |
| Category 3 | 0.059 | 0.126 | 1.061 (0.829 to 1.358) | 0.641 |
| Pension |  |  |  |  |
| No | Reference |  |  |  |
| Yes | 0.193 | 0.134 | 1.213 (0.934 to 1.576) | 0.147 |
| Mildew odor at home |  |  |  |  |
| Yes | Reference |  |  |  |
| No | 0.136 | 0.107 | 1.146 (0.929 to 1.413) | 0.204 |
| Cooking fuels |  |  |  |  |
| Clean fuels | Reference |  |  |  |
| Solid fuels | -0.074 | 0.091 | 0.929 (0.777 to 1.108) | 0.412 |
| Other fuels | -0.050 | 0.160 | 0.951 (0.696 to 1.301) | 0.755 |
| Activities score | -0.015 | 0.008 | 0.985 (0.969 to 1.001) | 0.070 |
| Adequate medical care |  |  |  |  |
| Yes | Reference |  |  |  |
| No | -0.512 | 0.249 | 0.599 (0.368 to 0.975) | 0.039 |
| Regular physical examination |  |  |  |  |
| Yes | Reference |  |  |  |
| No | -0.085 | 0.084 | 0.919 (0.779 to 1.082) | 0.309 |
| Hearing impairment |  |  |  |  |
| Yes | Reference |  |  |  |
| No | 0.086 | 0.089 | 1.090 (0.915 to 1.298) | 0.335 |
| Visual impairment |  |  |  |  |
| No | Reference |  |  |  |
| Yes | -0.186 | 0.117 | 0.830 (0.660 to 1.045) | 0.112 |
| Teeth loss |  |  |  |  |
| No | Reference |  |  |  |
| Yes | 0.056 | 0.146 | 1.058 (0.795 to 1.408) | 0.702 |
| Depressive symptoms |  |  |  |  |
| No | Reference |  |  |  |
| Yes | 0.291 | 0.099 | 1.338 (1.102 to 1.624) | 0.003 |
| MMSE score | -0.003 | 0.008 | 0.997 (0.982 to 1.011) | 0.650 |
| BADL score | 0 | 0.026 | 1.000 (0.950 to 1.052) | 0.992 |
| MCCs |  |  |  |  |
| No | Reference |  |  |  |
| Yes | 0.212 | 0.086 | 1.236 (1.044 to 1.464) | 0.014 |

*Category 1: staff of farming/forestry/animal husbandry/side-line production/fishery; Category 2: workers/teachers/doctors/military/government workers/businessmen; Category 3: others

**Supplementary Table 20** The association between SWB and the risk of CVD among Chinese older adults with 4-6 healthy lifestyles suggested by multivariable modified Poisson regressions

| Variables | Coefficient | S.E | RR (95%CI) | P-value |
| --- | --- | --- | --- | --- |
| SWB (per 1-SD) | -0.197 | 0.059 | 0.821 (0.731 to 0.922) | 0.001 |
| Age | -0.009 | 0.007 | 0.991 (0.978 to 1.005) | 0.199 |
| Sex |  |  |  |  |
| Male | Reference |  |  |  |
| Female | -0.004 | 0.121 | 0.996 (0.787 to 1.262) | 0.977 |
| Nation |  |  |  |  |
| Han | Reference |  |  |  |
| Minority | -0.863 | 0.395 | 0.422 (0.195 to 0.914) | 0.029 |
| Residence |  |  |  |  |
| Rural | Reference |  |  |  |
| Urban | 0.122 | 0.112 | 1.130 (0.907 to 1.408) | 0.276 |
| Marital status |  |  |  |  |
| Married | Reference |  |  |  |
| Others | 0.093 | 0.124 | 1.097 (0.862 to 1.399) | 0.45 |
| Education |  |  |  |  |
| 0 year | Reference |  |  |  |
| 1-6 years | 0.35 | 0.129 | 1.419(1.102-1.829) | 0.007 |
| ≥ 7 years | 0.409 | 0.189 | 1.505(1.039-2.181) | 0.031 |
| *Occupation |  |  |  |  |
| Category 1 | Reference |  |  |  |
| Category 2 | 0.219 | 0.168 | 1.245 (0.895 to 1.732) | 0.194 |
| Category 3 | 0.027 | 0.171 | 1.027 (0.736 to 1.436) | 0.872 |
| Pension |  |  |  |  |
| No | Reference |  |  |  |
| Yes | 0.075 | 0.170 | 1.078 (0.772 to 1.505) | 0.661 |
| Mildew odor at home |  |  |  |  |
| Yes | Reference |  |  |  |
| No | -0.052 | 0.138 | 0.949 (0.725 to 1.244) | 0.704 |
| Cooking fuels |  |  |  |  |
| Clean fuels | Reference |  |  |  |
| Solid fuels | -0.128 | 0.127 | 0.880 (0.686 to 1.129) | 0.312 |
| Other fuels | 0.255 | 0.180 | 1.290 (0.906 to 1.837) | 0.158 |
| Activities score | -0.016 | 0.011 | 0.984 (0.964 to 1.006) | 0.149 |
| Adequate medical care |  |  |  |  |
| Yes | Reference |  |  |  |
| No | -0.683 | 0.407 | 0.505 (0.228 to 1.121) | 0.093 |
| Regular physical examination |  |  |  |  |
| Yes | Reference |  |  |  |
| No | -0.064 | 0.109 | 0.938 (0.757 to 1.163) | 0.562 |
| Hearing impairment |  |  |  |  |
| Yes | Reference |  |  |  |
| No | 0.193 | 0.120 | 1.213 (0.958 to 1.536) | 0.109 |
| Visual impairment |  |  |  |  |
| No | Reference |  |  |  |
| Yes | -0.214 | 0.157 | 0.807 (0.593 to 1.097) | 0.172 |
| Teeth loss |  |  |  |  |
| No | Reference |  |  |  |
| Yes | 0.132 | 0.196 | 1.141 (0.776 to 1.677) | 0.503 |
| Depressive symptoms |  |  |  |  |
| No | Reference |  |  |  |
| Yes | 0.359 | 0.134 | 1.432 (1.100 to 1.863) | 0.008 |
| MMSE score | -0.021 | 0.01 | 0.979 (0.961 to 0.999) | 0.036 |
| BADL score | 0.009 | 0.038 | 1.009 (0.937 to 1.087) | 0.815 |
| MCCs |  |  |  |  |
| No | Reference |  |  |  |
| Yes | 0.262 | 0.112 | 1.300 (1.043 to 1.619) | 0.02 |

*Category 1: staff of farming/forestry/animal husbandry/side-line production/fishery; Category 2: workers/teachers/doctors/military/government workers/businessmen; Category 3: others

**Supplementary Table 21** The association between SWB and the risk of CVD among Chinese older adults suggested by multivariable log-binomial regressions (Model S1)

| Variables | Coefficient | S.E | RR (95%CI) | P-value |
| --- | --- | --- | --- | --- |
| SWB (per 1-SD) | -0.113 | 0.036 | 0.894 (0.832 to 0.960) | 0.002 |
| Age | -0.006 | 0.004 | 0.994 (0.986 to 1.002) | 0.156 |
| Sex |  |  |  |  |
| Male | Reference |  |  |  |
| Female | -0.027 | 0.085 | 0.973 (0.825 to 1.149) | 0.749 |
| Race |  |  |  |  |
| Han | Reference |  |  |  |
| Minority | -0.342 | 0.165 | 0.710 (0.514 to 0.982) | 0.039 |
| Residence |  |  |  |  |
| Rural | Reference |  |  |  |
| Urban | 0.030 | 0.070 | 1.030 (0.897 to 1.183) | 0.671 |
| Marital status |  |  |  |  |
| Married | Reference |  |  |  |
| Others | 0.034 | 0.076 | 1.035 (0.891 to 1.201) | 0.655 |
| Education |  |  |  |  |
| 0 year | Reference |  |  |  |
| 1-6 years | 0.012 | 0.080 | 1.013 (0.865 to 1.185) | 0.877 |
| ≥ 7 years | -0.100 | 0.118 | 0.905 (0.717 to 1.141) | 0.399 |
| *Occupation |  |  |  |  |
| Category 1 | Reference |  |  |  |
| Category 2 | 0.269 | 0.105 | 1.308 (1.064 to 1.608) | 0.011 |
| Category 3 | 0.125 | 0.105 | 1.133 (0.923 to 1.392) | 0.233 |
| Pension |  |  |  |  |
| No | Reference |  |  |  |
| Yes | 0.126 | 0.113 | 1.134 (0.908 to 1.416) | 0.267 |
| Mildew odor at home |  |  |  |  |
| Yes | Reference |  |  |  |
| No | 0.044 | 0.084 | 1.045 (0.886 to 1.233) | 0.599 |
| Cooking fuels |  |  |  |  |
| Clean fuels | Reference |  |  |  |
| Solid fuels | -0.055 | 0.076 | 0.946 (0.816 to 1.098) | 0.467 |
| Other fuels | 0.157 | 0.119 | 1.170 (0.926 to 1.477) | 0.188 |
| BMI | 0.032 | 0.007 | 1.032 (1.019 to 1.046) | 0.000 |
| Smoking status |  |  |  |  |
| Never | Reference |  |  |  |
| Ever | 0.278 | 0.092 | 1.321 (1.104 to 1.581) | 0.002 |
| Currently | 0.044 | 0.096 | 1.045 (0.866 to 1.261) | 0.645 |
| Drinking status |  |  |  |  |
| Never | Reference |  |  |  |
| Ever | 0.143 | 0.090 | 1.154 (0.967 to 1.377) | 0.112 |
| Currently | -0.085 | 0.092 | 0.919 (0.767 to 1.101) | 0.358 |
| Duration of sleep |  |  |  |  |
| 6-8 hours | Reference |  |  |  |
| < 6 hours | 0.051 | 0.089 | 1.052 (0.884 to 1.252) | 0.566 |
| > 8 hours | -0.083 | 0.074 | 0.920 (0.796 to 1.064) | 0.262 |
| Activities score | -0.010 | 0.007 | 0.990 (0.977 to 1.003) | 0.122 |
| Regular exercise |  |  |  |  |
| Never | Reference |  |  |  |
| Ever | 0.220 | 0.098 | 1.247 (1.029 to 1.510) | 0.024 |
| Currently | 0.080 | 0.077 | 1.084 (0.931 to 1.261) | 0.298 |
| DD score | -0.019 | 0.018 | 0.981 (0.947 to 1.016) | 0.290 |
| Adequate medical care |  |  |  |  |
| Yes | Reference |  |  |  |
| No | -0.491 | 0.188 | 0.612 (0.423 to 0.885) | 0.009 |
| Regular physical examination |  |  |  |  |
| Yes | Reference |  |  |  |
| No | -0.100 | 0.068 | 0.905 (0.792 to 1.034) | 0.140 |
| Hearing impairment |  |  |  |  |
| Yes | Reference |  |  |  |
| No | 0.050 | 0.072 | 1.051 (0.913 to 1.210) | 0.490 |
| Visual impairment |  |  |  |  |
| No | Reference |  |  |  |
| Yes | -0.123 | 0.091 | 0.884 (0.740 to 1.057) | 0.178 |
| Teeth loss |  |  |  |  |
| No | Reference |  |  |  |
| Yes | 0.080 | 0.122 | 1.083 (0.854 to 1.375) | 0.510 |
| Depressive symptoms |  |  |  |  |
| No | Reference |  |  |  |
| Yes | 0.189 | 0.082 | 1.208 (1.030 to 1.417) | 0.020 |
| MMSE score | -0.010 | 0.007 | 0.990 (0.978 to 1.003) | 0.140 |
| BADL score | 0.019 | 0.021 | 1.019 (0.978 to 1.063) | 0.366 |
| MCCs |  |  |  |  |
| No | Reference |  |  |  |
| Yes | 0.183 | 0.071 | 1.200 (1.045 to 1.379) | 0.010 |

*Category 1: staff of farming/forestry/animal husbandry/side-line production/fishery; Category 2: workers/teachers/doctors/military/government workers/businessmen; Category 3: others

**Supplementary Table 22** The association between SWB and the risk of CVD among Chinese older adults suggested by multivariable modified Poisson regressions based on complete-case method (Model S2)

| Variables | Coefficient | S.E | RR (95%CI) | P-value |
| --- | --- | --- | --- | --- |
| SWB (per 1-SD) | -0.088 | 0.044 | 0.916 (0.840 to 0.999) | 0.047 |
| Age | -0.003 | 0.005 | 0.997 (0.986 to 1.007) | 0.53 |
| Sex |  |  |  |  |
| Male | Reference |  |  |  |
| Female | -0.039 | 0.103 | 0.962 (0.786 to 1.178) | 0.708 |
| Race |  |  |  |  |
| Han | Reference |  |  |  |
| Minority | -0.377 | 0.215 | 0.686 (0.450 to 1.046) | 0.08 |
| Residence |  |  |  |  |
| Rural | Reference |  |  |  |
| Urban | 0.049 | 0.086 | 1.050 (0.889 to 1.242) | 0.564 |
| Marital status |  |  |  |  |
| Married | Reference |  |  |  |
| Others | 0.075 | 0.092 | 1.078 (0.900 to 1.290) | 0.415 |
| Education |  |  |  |  |
| 0 year | Reference |  |  |  |
| 1-6 years | 0.013 | 0.099 | 1.013 (0.835 to 1.229) | 0.895 |
| ≥ 7 years | -0.078 | 0.140 | 0.925 (0.704 to 1.217) | 0.578 |
| *Occupation |  |  |  |  |
| Category 1 | Reference |  |  |  |
| Category 2 | 0.260 | 0.134 | 1.297 (0.997 to 1.687) | 0.052 |
| Category 3 | 0.125 | 0.124 | 1.133 (0.890 to 1.445) | 0.312 |
| Pension |  |  |  |  |
| No | Reference |  |  |  |
| Yes | 0.074 | 0.134 | 1.077 (0.828 to 1.401) | 0.584 |
| Mildew odor at home |  |  |  |  |
| Yes | Reference |  |  |  |
| No | -0.019 | 0.099 | 0.981 (0.808 to 1.192) | 0.852 |
| Cooking fuels |  |  |  |  |
| Clean fuels | Reference |  |  |  |
| Solid fuels | -0.096 | 0.090 | 0.908 (0.760 to 1.084) | 0.286 |
| Other fuels | 0.086 | 0.150 | 1.090 (0.812 to 1.462) | 0.567 |
| BMI | 0.033 | 0.009 | 1.034 (1.015 to 1.052) | <0.001 |
| Smoking status |  |  |  |  |
| Never | Reference |  |  |  |
| Ever | 0.196 | 0.107 | 1.217 (0.986 to 1.501) | 0.068 |
| Currently | 0.024 | 0.111 | 1.024 (0.824 to 1.274) | 0.828 |
| Drinking status |  |  |  |  |
| Never | Reference |  |  |  |
| Ever | 0.158 | 0.103 | 1.171 (0.957 to 1.433) | 0.126 |
| Currently | -0.01 | 0.108 | 0.990 (0.801 to 1.223) | 0.923 |
| Duration of sleep |  |  |  |  |
| 6-8 hours | Reference |  |  |  |
| < 6 hours | 0.148 | 0.105 | 1.160 (0.943 to 1.425) | 0.162 |
| > 8 hours | -0.079 | 0.089 | 0.924 (0.776 to 1.101) | 0.375 |
| Activities score | -0.009 | 0.008 | 0.991 (0.975 to 1.007) | 0.25 |
| Regular exercise |  |  |  |  |
| Never | Reference |  |  |  |
| Ever | 0.232 | 0.115 | 1.261 (1.007 to 1.579) | 0.043 |
| Currently | 0.049 | 0.093 | 1.050 (0.876 to 1.260) | 0.594 |
| DD score | 0.182 | 0.058 | 1.200 (1.071 to 1.343) | 0.002 |
| Adequate medical care |  |  |  |  |
| Yes | Reference |  |  |  |
| No | -0.288 | 0.213 | 0.750 (0.494 to 1.139) | 0.177 |
| Regular physical examination |  |  |  |  |
| Yes | Reference |  |  |  |
| No | -0.059 | 0.082 | 0.943 (0.803 to 1.106) | 0.468 |
| Hearing impairment |  |  |  |  |
| Yes | Reference |  |  |  |
| No | 0.053 | 0.087 | 1.054 (0.890 to 1.251) | 0.539 |
| Visual impairment |  |  |  |  |
| No | Reference |  |  |  |
| Yes | -0.129 | 0.116 | 0.879 (0.700 to 1.103) | 0.264 |
| Teeth loss |  |  |  |  |
| No | Reference |  |  |  |
| Yes | 0.087 | 0.138 | 1.091 (0.832 to 1.430) | 0.53 |
| Depressive symptoms |  |  |  |  |
| No | Reference |  |  |  |
| Yes | 0.124 | 0.098 | 1.132 (0.934 to 1.372) | 0.205 |
| MMSE score | 0.001 | 0.008 | 1.001 (0.985 to 1.017) | 0.922 |
| BADL score | -0.014 | 0.024 | 0.986 (0.941 to 1.033) | 0.552 |
| MCCs |  |  |  |  |
| No | Reference |  |  |  |
| Yes | 0.122 | 0.087 | 1.130 (0.953 to 1.34) | 0.160 |

*Category 1: staff of farming/forestry/animal husbandry/side-line production/fishery; Category 2: workers/teachers/doctors/military/government workers/businessmen; Category 3: others

**Supplementary Table 23** The association between SWB and the risk of CVD among older Chinese adults suggested by multivariable modified Poisson regressions with MCCs was replaced by chronic conditions that were considered as risk factors of CVD (Model S3)

| Variables | Coefficient | S.E | RR (95% CI) | P-value |
| --- | --- | --- | --- | --- |
| SWB (per 1-SD) | -0.109 | 0.037 | 0.897 (0.835 to 0.964) | 0.003 |
| Age | -0.004 | 0.004 | 0.996 (0.987 to 1.004) | 0.302 |
| Sex |  |  |  |  |
| Male | Reference |  |  |  |
| Female | -0.043 | 0.087 | 0.958 (0.807 to 1.137) | 0.624 |
| Race |  |  |  |  |
| Han | Reference |  |  |  |
| Minority | -0.338 | 0.166 | 0.713 (0.515 to 0.987) | 0.042 |
| Residence |  |  |  |  |
| Rural | Reference |  |  |  |
| Urban | 0.041 | 0.071 | 1.042 (0.908 to 1.197) | 0.560 |
| Marital status |  |  |  |  |
| Married | Reference |  |  |  |
| Others | 0.014 | 0.079 | 1.014 (0.869 to 1.183) | 0.860 |
| Education |  |  |  |  |
| 0 year | Reference |  |  |  |
| 1-6 years | 0.023 | 0.083 | 1.023 (0.869 to 1.203) | 0.784 |
| ≥ 7 years | -0.086 | 0.122 | 0.918 (0.723 to 1.165) | 0.481 |
| *Occupation |  |  |  |  |
| Category 1 | Reference |  |  |  |
| Category 2 | 0.254 | 0.105 | 1.289 (1.050 to 1.584) | 0.015 |
| Category 3 | 0.121 | 0.105 | 1.129 (0.919 to 1.387) | 0.251 |
| Pension |  |  |  |  |
| No | Reference |  |  |  |
| Yes | 0.125 | 0.111 | 1.133 (0.911 to 1.409) | 0.262 |
| Mildew odor at home |  |  |  |  |
| Yes | Reference |  |  |  |
| No | 0.031 | 0.084 | 1.031 (0.874 to 1.217) | 0.717 |
| Cooking fuels |  |  |  |  |
| Clean fuels | Reference |  |  |  |
| Solid fuels | -0.041 | 0.075 | 0.960 (0.829 to 1.111) | 0.581 |
| Other fuels | 0.15 | 0.119 | 1.162 (0.920 to 1.465) | 0.207 |
| BMI | 0.025 | 0.007 | 1.025 (1.011 to 1.040) | 0.001 |
| Smoking status |  |  |  |  |
| Never | Reference |  |  |  |
| Ever | 0.246 | 0.091 | 1.279 (1.069 to 1.530) | 0.007 |
| Currently | 0.027 | 0.096 | 1.027 (0.852 to 1.239) | 0.778 |
| Drinking status |  |  |  |  |
| Never | Reference |  |  |  |
| Ever | 0.142 | 0.090 | 1.153 (0.966 to 1.376) | 0.116 |
| Currently | -0.063 | 0.094 | 0.939 (0.781 to 1.129) | 0.502 |
| Duration of sleep |  |  |  |  |
| 6-8 hours | Reference |  |  |  |
| < 6 hours | 0.050 | 0.090 | 1.051 (0.882 to 1.252) | 0.581 |
| > 8 hours | -0.075 | 0.075 | 0.928 (0.801 to 1.075) | 0.316 |
| Activities score | -0.010 | 0.007 | 0.990 (0.977 to 1.004) | 0.157 |
| Regular exercise |  |  |  |  |
| Never | Reference |  |  |  |
| Ever | 0.230 | 0.098 | 1.259 (1.038 to 1.527) | 0.019 |
| Currently | 0.075 | 0.078 | 1.078 (0.926 to 1.255) | 0.334 |
| DD score | -0.020 | 0.018 | 0.980 (0.946 to 1.015) | 0.263 |
| Adequate medical care |  |  |  |  |
| Yes | Reference |  |  |  |
| No | -0.487 | 0.189 | 0.614 (0.424 to 0.89) | 0.010 |
| Regular physical examination |  |  |  |  |
| Yes | Reference |  |  |  |
| No | -0.079 | 0.069 | 0.924 (0.807 to 1.058) | 0.252 |
| Hearing impairment |  |  |  |  |
| Yes | Reference |  |  |  |
| No | 0.037 | 0.073 | 1.038 (0.899 to 1.196) | 0.615 |
| Visual impairment |  |  |  |  |
| No | Reference |  |  |  |
| Yes | -0.108 | 0.092 | 0.898 (0.751 to 1.075) | 0.239 |
| Teeth loss |  |  |  |  |
| No | Reference |  |  |  |
| Yes | 0.069 | 0.123 | 1.071 (0.842 to 1.362) | 0.576 |
| Depressive symptoms |  |  |  |  |
| No | Reference |  |  |  |
| Yes | 0.176 | 0.082 | 1.192(1.015 to 1.402) | 0.032 |
| MMSE score | -0.009 | 0.006 | 0.991 (0.979 to 1.003) | 0.160 |
| BADL score | 0.015 | 0.021 | 1.015 (0.972 to 1.059) | 0.497 |
| Hypertension |  |  |  |  |
| No | Reference |  |  |  |
| Yes | 0.383 | 0.067 | 1.467 (1.284 to 1.674) | <0.001 |
| Diabetes |  |  |  |  |
| No | Reference |  |  |  |
| Yes | 0.288 | 0.139 | 1.334 (1.016 to 1.752) | 0.038 |
| Dyslipidemia |  |  |  |  |
| No | Reference |  |  |  |
| Yes | -0.138 | 0.222 | 0.871 (0.563 to 1.347) | 0.536 |
| Chronic nephritis |  |  |  |  |
| No | Reference |  |  |  |
| Yes | 0.118 | 0.316 | 1.125 (0.606 to 2.09) | 0.708 |
| Cancer |  |  |  |  |
| No | Reference |  |  |  |
| Yes | 0.155 | 0.325 | 1.168 (0.617 to 2.208) | 0.635 |

*Category 1: staff of farming/forestry/animal husbandry/side-line production/fishery; Category 2: workers/teachers/doctors/military/government workers/businessmen; Category 3: others

**Supplementary Table 24** The association between SWB and the risk of CVD among Chinese older adults suggested by multivariable modified Poisson regressions with SWB score was transformed to categorical variable (Model S4)

| Variables | Coefficient | S.E | RR (95% CI) | P-value |
| --- | --- | --- | --- | --- |
| SWB score |  |  |  |  |
| Q1 (< 28) | Reference |  |  |  |
| Q2 (28-32) | -0.178 | 0.083 | 0.837 (0.711 to 0.985) | 0.032 |
| Q3 (> 32) | -0.249 | 0.087 | 0.780 (0.658 to 0.924) | 0.004 |
| Age | -0.006 | 0.004 | 0.994 (0.986 to 1.003) | 0.181 |
| Sex |  |  |  |  |
| Male | Reference |  |  |  |
| Female | -0.025 | 0.086 | 0.975 (0.823 to 1.155) | 0.770 |
| Race |  |  |  |  |
| Han | Reference |  |  |  |
| Minority | -0.351 | 0.165 | 0.704 (0.509 to 0.972) | 0.033 |
| Residence |  |  |  |  |
| Rural | Reference |  |  |  |
| Urban | 0.034 | 0.071 | 1.035 (0.900 to 1.190) | 0.630 |
| Marital status |  |  |  |  |
| Married | Reference |  |  |  |
| Others | 0.020 | 0.079 | 1.020 (0.874 to 1.191) | 0.800 |
| Education |  |  |  |  |
| 0 year | Reference |  |  |  |
| 1-6 years | 0.013 | 0.083 | 1.013 (0.862 to 1.191) | 0.874 |
| ≥ 7 years | -0.096 | 0.122 | 0.908 (0.715 to 1.154) | 0.431 |
| *Occupation |  |  |  |  |
| Category 1 | Reference |  |  |  |
| Category 2 | 0.270 | 0.104 | 1.310 (1.068 to 1.606) | 0.010 |
| Category 3 | 0.125 | 0.105 | 1.133 (0.923 to 1.392) | 0.232 |
| Pension |  |  |  |  |
| No | Reference |  |  |  |
| Yes | 0.116 | 0.110 | 1.123 (0.905 to 1.392) | 0.294 |
| Mildew odor at home |  |  |  |  |
| Yes | Reference |  |  |  |
| No | 0.025 | 0.084 | 1.025 (0.869 to 1.209) | 0.766 |
| Cooking fuels |  |  |  |  |
| Clean fuels | Reference |  |  |  |
| Solid fuels | -0.054 | 0.076 | 0.947 (0.817 to 1.099) | 0.474 |
| Other fuels | 0.139 | 0.120 | 1.149 (0.909 to 1.454) | 0.244 |
| BMI | 0.030 | 0.007 | 1.030 (1.017 to 1.044) | <0.001 |
| Smoking status |  |  |  |  |
| Never | Reference |  |  |  |
| Ever | 0.271 | 0.091 | 1.311 (1.097 to 1.568) | 0.003 |
| Currently | 0.043 | 0.095 | 1.044 (0.866 to 1.259) | 0.650 |
| Drinking status |  |  |  |  |
| Never | Reference |  |  |  |
| Ever | 0.146 | 0.09 | 1.157 (0.970 to 1.380) | 0.104 |
| Currently | -0.079 | 0.094 | 0.924 (0.769 to 1.110) | 0.396 |
| Duration of sleep |  |  |  |  |
| 6-8 hours | Reference |  |  |  |
| < 6 hours | 0.046 | 0.090 | 1.047 (0.877 to 1.250) | 0.610 |
| > 8 hours | -0.079 | 0.075 | 0.924 (0.798 to 1.069) | 0.289 |
| Activities score | -0.011 | 0.007 | 0.989 (0.976 to 1.002) | 0.110 |
| Regular exercise |  |  |  |  |
| Never | Reference |  |  |  |
| Ever | 0.224 | 0.098 | 1.251 (1.031 to 1.517) | 0.023 |
| Currently | 0.078 | 0.078 | 1.081 (0.928 to 1.261) | 0.316 |
| DD score | -0.021 | 0.018 | 0.979 (0.946 to 1.014) | 0.230 |
| Adequate medical care |  |  |  |  |
| Yes | Reference |  |  |  |
| No | -0.474 | 0.188 | 0.623 (0.430 to 0.900) | 0.012 |
| Regular physical examination |  |  |  |  |
| Yes | Reference |  |  |  |
| No | -0.096 | 0.069 | 0.908 (0.793 to 1.040) | 0.163 |
| Hearing impairment |  |  |  |  |
| Yes | Reference |  |  |  |
| No | 0.044 | 0.073 | 1.045 (0.905 to 1.206) | 0.550 |
| Visual impairment |  |  |  |  |
| No | Reference |  |  |  |
| Yes | -0.123 | 0.092 | 0.884 (0.739 to 1.059) | 0.181 |
| Teeth loss |  |  |  |  |
| No | Reference |  |  |  |
| Yes | 0.075 | 0.122 | 1.078 (0.848 to 1.369) | 0.542 |
| Depressive symptoms |  |  |  |  |
| No | Reference |  |  |  |
| Yes | 0.189 | 0.081 | 1.208 (1.030 to 1.418) | 0.020 |
| MMSE score | -0.009 | 0.006 | 0.991 (0.979 to 1.003) | 0.153 |
| BADL score | 0.017 | 0.022 | 1.017 (0.975 to 1.062) | 0.426 |
| MCCs |  |  |  |  |
| No | Reference |  |  |  |
| Yes | 0.177 | 0.071 | 1.194 (1.038 to 1.372) | 0.013 |

*Category 1: staff of farming/forestry/animal husbandry/side-line production/fishery; Category 2: workers/teachers/doctors/military/government workers/businessmen; Category 3: others

**Supplementary Table 25** The association between SWB and the risk of CVD among Chinese older adults suggested by multivariable modified Poisson regressions adjusting for covariates with P < 0.10 in differential comparison (Model S5)

| Variables | Coefficient | S.E | RR (95%CI) | P-value |
| --- | --- | --- | --- | --- |
| SWB (per 1-SD) | -0.133 | 0.035 | 0.875 (0.816 to 0.938) | <0.001 |
| Age | -0.003 | 0.003 | 0.997 (0.991 to 1.003) | 0.312 |
| Sex |  |  |  |  |
| Male | Reference |  |  |  |
| Female | -0.002 | 0.081 | 0.998 (0.851 to 1.170) | 0.982 |
| Nation |  |  |  |  |
| Han | Reference |  |  |  |
| Minority | -0.344 | 0.166 | 0.709 (0.512 to 0.981) | 0.038 |
| Residence |  |  |  |  |
| Rural | Reference |  |  |  |
| Urban | 0.010 | 0.070 | 1.010 (0.880 to 1.160) | 0.882 |
| *Occupation |  |  |  |  |
| Category 1 | Reference |  |  |  |
| Category 2 | 0.247 | 0.101 | 1.280 (1.049 to 1.562) | 0.015 |
| Category 3 | 0.119 | 0.105 | 1.126 (0.917 to 1.384) | 0.259 |
| Pension |  |  |  |  |
| No | Reference |  |  |  |
| Yes | 0.074 | 0.109 | 1.077 (0.869 to 1.332) | 0.499 |
| Cooking fuels |  |  |  |  |
| Clean fuels | Reference |  |  |  |
| Solid fuels | -0.052 | 0.074 | 0.949 (0.821 to 1.097) | 0.481 |
| Other fuels | 0.142 | 0.119 | 1.153 (0.912 to 1.456) | 0.233 |
| BMI | 0.029 | 0.007 | 1.029 (1.016 to 1.044) | <0.001 |
| Smoking status |  |  |  |  |
| Never | Reference |  |  |  |
| Ever | 0.258 | 0.091 | 1.294 (1.083 to 1.545) | 0.004 |
| Currently | 0.026 | 0.095 | 1.026 (0.852 to 1.236) | 0.784 |
| Drinking status |  |  |  |  |
| Never | Reference |  |  |  |
| Ever | 0.132 | 0.09 | 1.141 (0.957 to 1.361) | 0.142 |
| Currently | -0.091 | 0.094 | 0.913 (0.760 to 1.096) | 0.330 |
| Regular exercise |  |  |  |  |
| Never | Reference |  |  |  |
| Ever | 0.227 | 0.098 | 1.255 (1.035 to 1.520) | 0.021 |
| Currently | 0.059 | 0.075 | 1.061 (0.916 to 1.229) | 0.430 |
| Adequate medical care |  |  |  |  |
| Yes | Reference |  |  |  |
| No | -0.468 | 0.188 | 0.626 (0.434 to 0.905) | 0.013 |
| Regular physical examination |  |  |  |  |
| Yes | Reference |  |  |  |
| No | -0.074 | 0.068 | 0.929 (0.812 to 1.062) | 0.278 |
| Depressive symptoms |  |  |  |  |
| No | Reference |  |  |  |
| Yes | 0.174 | 0.082 | 1.190 (1.014 to 1.398) | 0.033 |
| MCCs |  |  |  |  |
| No | Reference |  |  |  |
| Yes | 0.178 | 0.071 | 1.195 (1.04 to 1.373) | 0.012 |

*Category 1: staff of farming/forestry/animal husbandry/side-line production/fishery; Category 2: workers/teachers/doctors/military/government workers/businessmen; Category 3: others


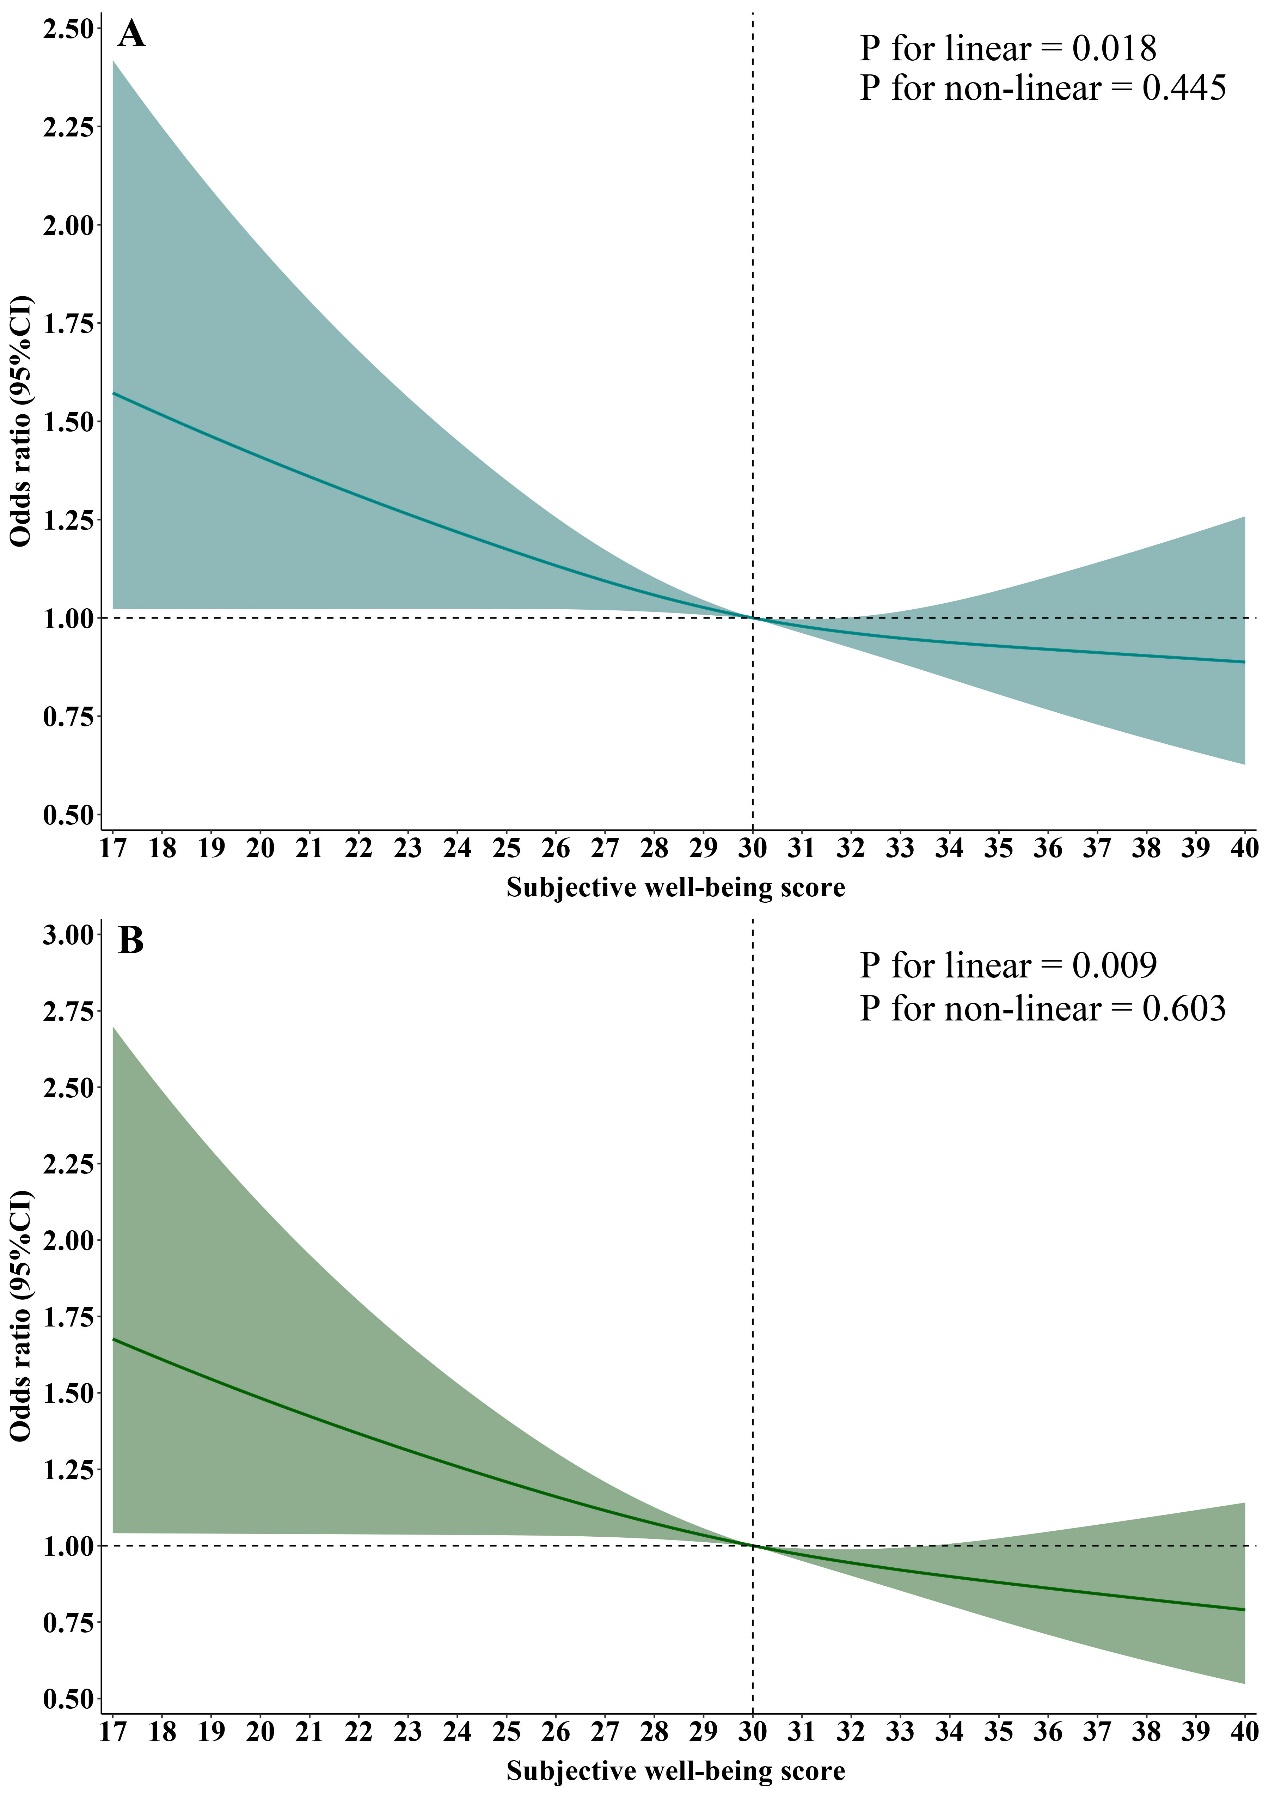


**Supplementary Figure 1** The linear relationship between SWB score and the risk of CVD showed by restrict cubic spline on the basis of binary logistic regressions. A: univariable binary logistic regressions, B: multivariable binary logistic regressions
